# Supplementary material for: Catalytic deuteration of silanes mediated by N-heterocyclic carbene-Ir(iii) complexes
Source: Royal Society of Chemistry journal article supplement (doi:10.1039/c1cc13492b), 2011-01-01
Supplement: c1cc13492b.pdf [file c1cc13492b.pdf]

Electronic Supplementary Information for  
**Catalytic Deuteration of Silanes Mediated by *N*-Heterocyclic  
Carbene-Ir(III) Complexes**

*George C. Fortman<sup>†</sup>, Heiko Jacobsen<sup>‡</sup>, Luigi Cavallo<sup>§\*</sup> and Steven P. Nolan<sup>†\*</sup>*

<sup>†</sup>EaStCHEM School of Chemistry, University of St Andrews, St Andrews, KY16 9ST (UK)

<sup>‡</sup>KemKom, 1215 Ursulines Ave., New Orleans, Louisiana, 70116 (USA)

<sup>§</sup>Department of Chemistry and Biology, University of Salerno, Via ponte don Melillo, 84084, Fisciano (Italy)

CORRESPONDING AUTHOR: [snolan@st-andrews.ac.uk](mailto:snolan@st-andrews.ac.uk); [lcavallo@unisa.it](mailto:lcavallo@unisa.it)

Table of Contents

|                                                                                  |         |
|----------------------------------------------------------------------------------|---------|
| Experimental Section                                                             | S2-S3   |
| Kinetic Experiment Figure S1                                                     | S3      |
| NMR Experiments Figures S2-S3                                                    | S4-S5   |
| DFT calculations of free energy for Si-H/D exchange Figure S4                    | S6      |
| <sup>1</sup> H an <sup>19</sup> F NMR Spectra of Catalysts <b>2</b> and <b>3</b> | S6-S12  |
| DFT structures and energies                                                      | S13-S42 |
| References                                                                       | S43     |

## Experimental Section

**General considerations.** Unless stated otherwise all reactions were carried out inside an MBraun Glovebox under inert conditions. Solvents were distilled and dried as required. Silanes were purchased from Sigma-Aldrich and used as received.  $[\text{MCl}(\text{I}^t\text{Bu}')_2]$  and  $[\text{M}(\text{I}^t\text{Bu}')_2][\text{PF}_6]$  (M = Rh (**2a/3a**), Ir (**2b/3b**) and  $[\text{IrHCl}(\text{ItBu})(\text{ItBu}')] (\mathbf{1})$  were prepared according to literature procedures.<sup>1</sup> The  $^1\text{H}$  and  $^{13}\text{C}$  NMR spectra were recorded on either a Bruker 400 MHz or a Bruker 300 MHz NMR spectrometer. High-pressure  $^1\text{H}$  NMR experiments were carried out using a 10 mm sapphire NMR tube. Elemental Analyses were performed at the London Metropolitan University.

**General procedure for the isotopic exchange of silanes.** In the glovebox a Schlenk tube was charged with a  $\text{CD}_2\text{Cl}_2$  (0.7 mL) 0.22 mmol of the silane and  $2.2 \times 10^{-3}$  mmol of the catalyst. The flask was removed from the glovebox. Using Schlenk techniques, the flask was charged with 0.5 atm of  $\text{D}_2$ . The reaction was stirred for the appropriate time at room temperature. The reaction was eventually opened to air and examined by  $^1\text{H}$ ,  $^{29}\text{Si}$  NMR and FTIR (Si-H  $\approx 2200 \text{ cm}^{-1}$ ; Si-D  $\approx 1500 \text{ cm}^{-1}$ ) spectroscopy. Yields were calculated from  $^1\text{H}$  NMR data and are assigned an uncertainty of  $\pm 5\%$ .

**Stoichiometric reaction between  $[\text{IrHCl}(\text{I}^t\text{Bu})(\text{I}^t\text{Bu}')] and  $\text{DSiEt}_3$ .$**  A J-Young tap NMR tube was charged with 5.0 mg ( $8.5 \times 10^{-3}$  mmol)  $[\text{IrHCl}(\text{I}^t\text{Bu})(\text{I}^t\text{Bu}')] which was dissolved in 0.7 \text{ mL } \text{CD}_2\text{Cl}_2$ . 25.0  $\mu\text{L}$  of the hydrosilane stock solution (13.7  $\mu\text{L}$   $\text{DSiEt}_3$  ( $8.5 \times 10^{-2}$  mmol) in 0.25 mL  $\text{CD}_2\text{Cl}_2$ ) was added. Growth of the silane hydride peak was

monitored by  $^1\text{H}$  NMR spectra recorded periodically over the course of 2 days and data are shown in Figure S3.

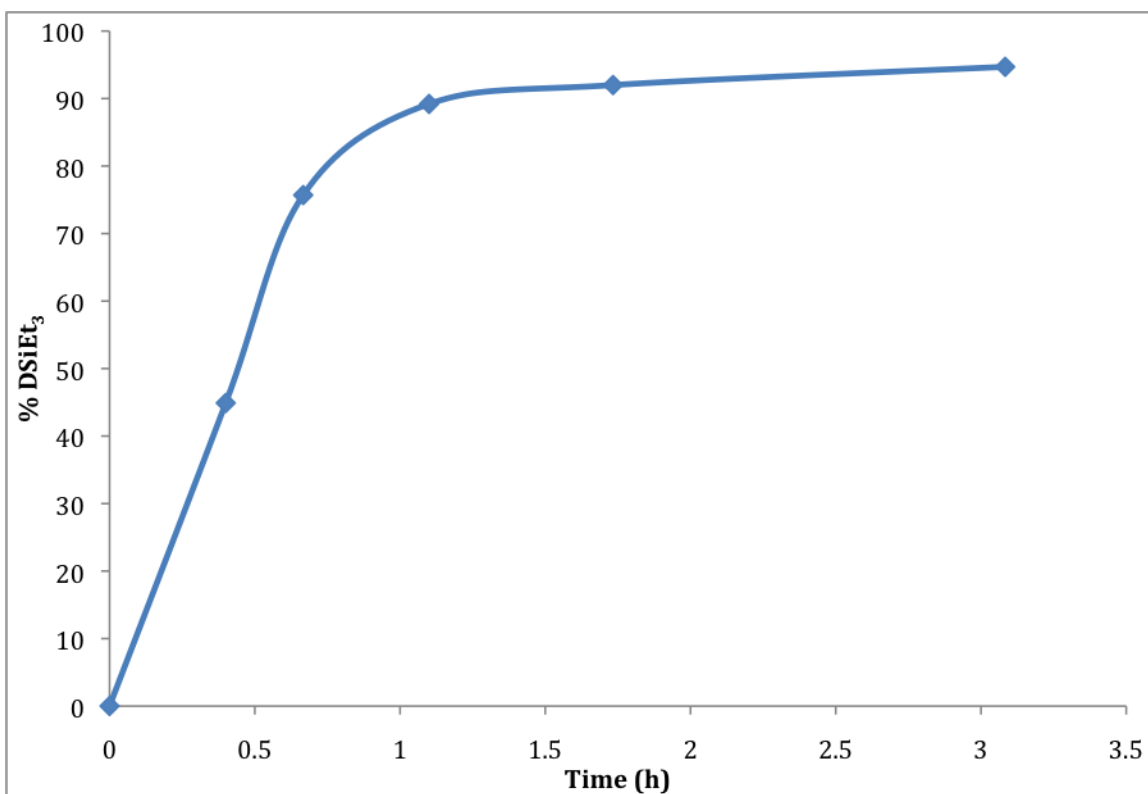

**Figure S1.** Conversion of HSiEt<sub>3</sub> to DSiEt<sub>3</sub> in CD<sub>2</sub>Cl<sub>2</sub> with catalyst loading of 0.01% IrCl(*t*Bu)<sub>2</sub> (**2b**) at 25 °C. Near complete conversion is reached in approximately 3 h.

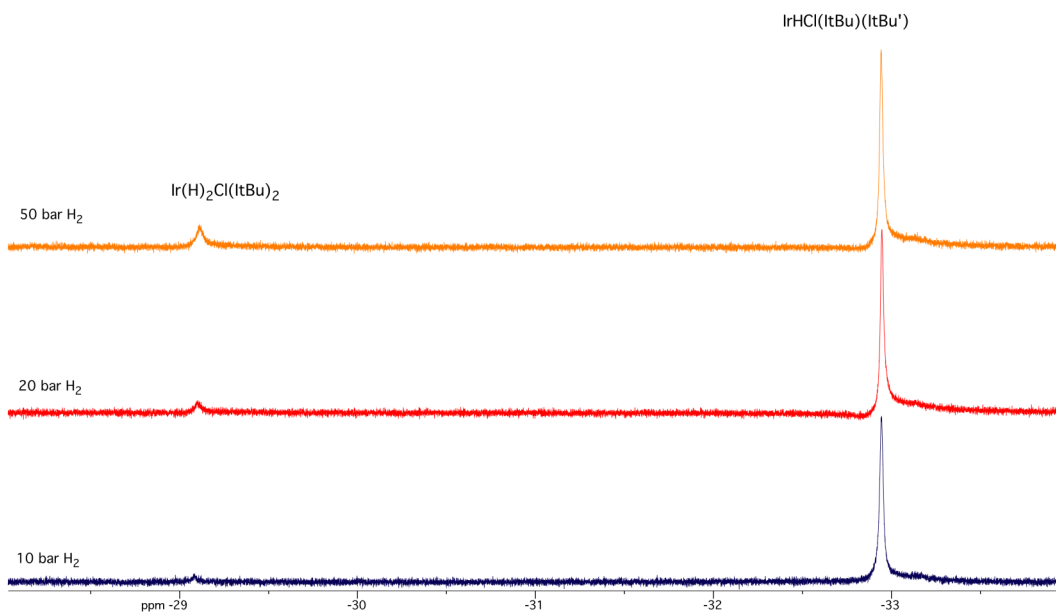

**Figure S2.** High pressure <sup>1</sup>H NMR spectra of hydride resonances of [IrHCl(I'Bu)(I'Bu')] and [Ir(H)<sub>2</sub>Cl(I'Bu)<sub>2</sub>]. The spectra are the result of a prepared solution of [IrCl(I'Bu')<sub>2</sub>] in CD<sub>2</sub>Cl<sub>2</sub> under the given amount of H<sub>2</sub> pressure. Growth of the shift attributed to the proposed [Ir(H)<sub>2</sub>Cl(I'Bu)<sub>2</sub>] is seen to increase with higher H<sub>2</sub> pressure.

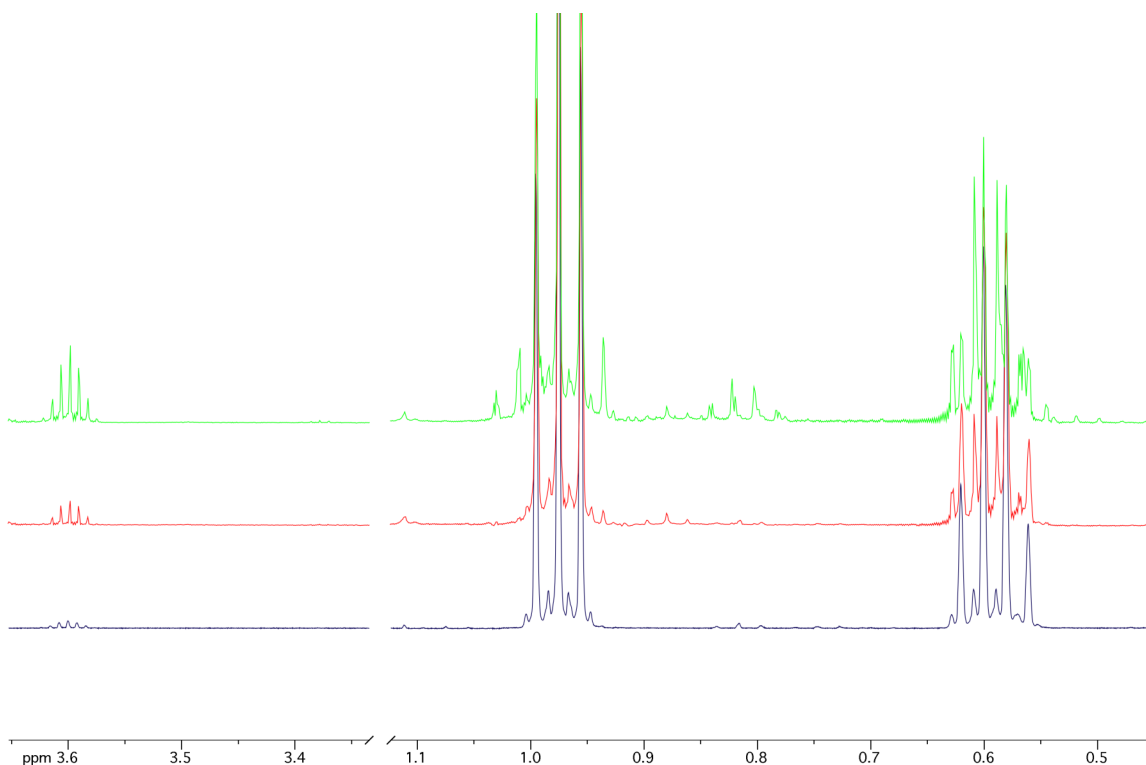

**Figure S3.**  $^1\text{H}$  NMR spectra of  $\text{HSiEt}_3$  in the stoichiometric reaction between  $[\text{IrHCl}(\text{I}'\text{Bu})(\text{I}'\text{Bu}')]$  and  $\text{DSiEt}_3$  in  $\text{CD}_2\text{Cl}_2$ .  $\text{H-SiEt}_3$  shift at 3.60 ppm. Blue spectra –  $\text{DSiEt}_3$  with no Ir (7 %  $\text{HSiEt}_3$ ). Red spectra 7 h after the addition of  $[\text{IrHCl}(\text{I}'\text{Bu})(\text{I}'\text{Bu}')]$  (32 %  $\text{HSiEt}_3$ ). Green spectra – 5 days after the addition of  $[\text{IrHCl}(\text{I}'\text{Bu})(\text{I}'\text{Bu}')]$  (70 %  $\text{HSiEt}_3$ ) Equal molar amounts of each reactant give rise to > 50%  $\text{DSiEt}_3$ . This is believed to be the result of involvement of the *ortho*-metalated  $\text{I}'\text{Bu}$  groups of the NHC and their ability to reversibly de-*ortho*-metalate which subsequently makes more than one H available per molecule of  $[\text{IrHCl}(\text{I}'\text{Bu})(\text{I}'\text{Bu}')]$ . The conversion to only 70%  $\text{HSiEt}_3$  indicates that this “proton shuffle” is quite slow compared to the rate of  $\text{DSi/IrH}$  exchange.

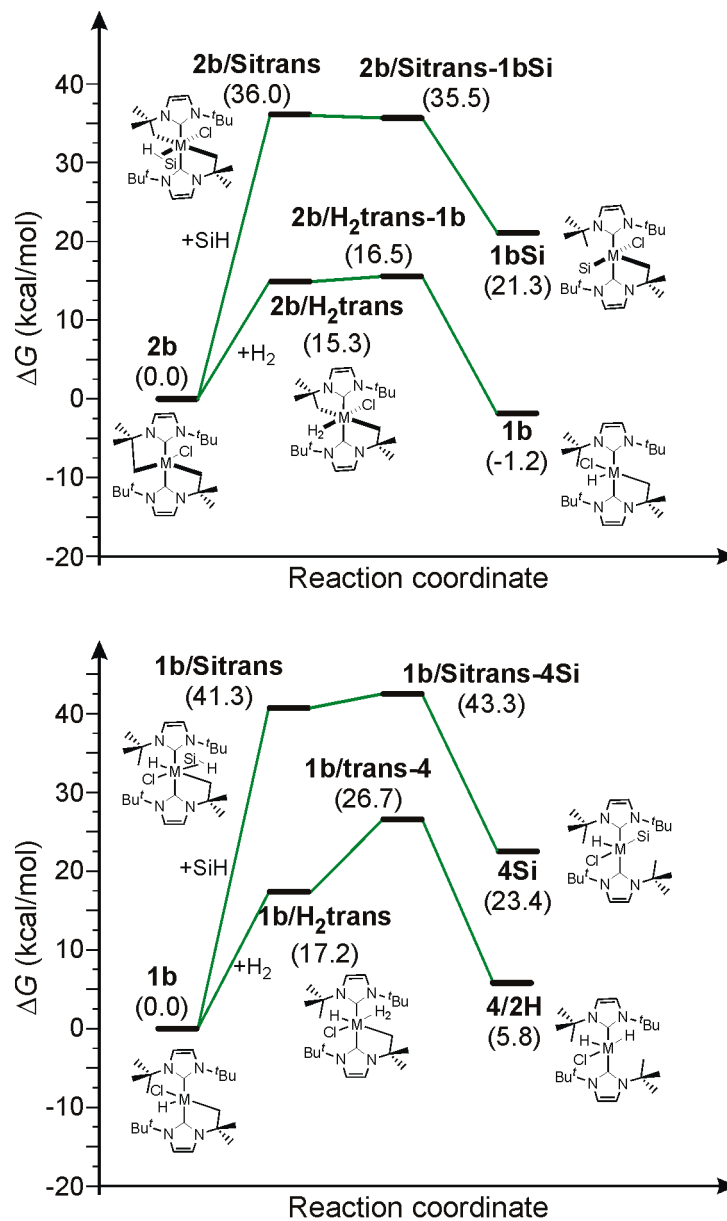

**Figure S4.** DFT calculations of free energy for possible reaction pathways for isotopic exchange of HSiMe<sub>3</sub> mediated by [IrHCl(I<sup>t</sup>Bu)(ItBu<sup>+</sup>)] (**1**) and [IrCl(I<sup>t</sup>Bu)<sub>2</sub>] (**2**).

$[\text{RhCl}(\text{t}^{\text{Bu}})_2]$  **2a**  
 $^1\text{H}$  400 MHz NMR  $\text{C}_6\text{D}_6$

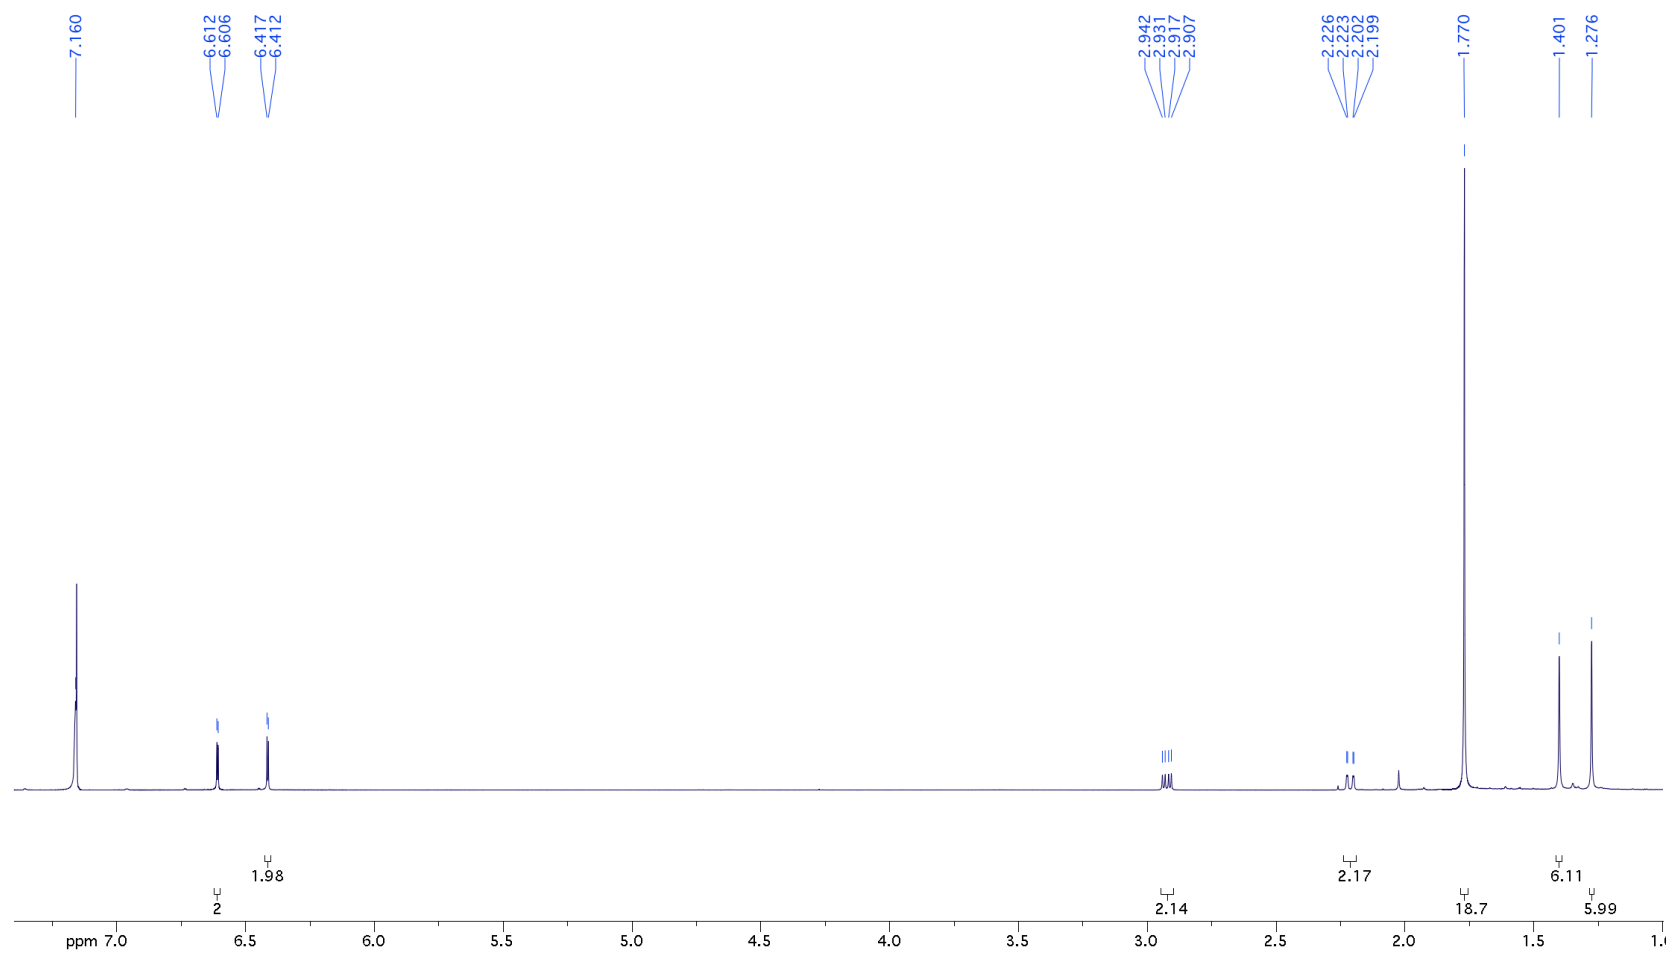

$[\text{Rh}(\text{ItBu}')_2][\text{PF}_6]$  **3a**

$^1\text{H}$  NMR 300 MHz  $\text{CD}_2\text{Cl}_2$

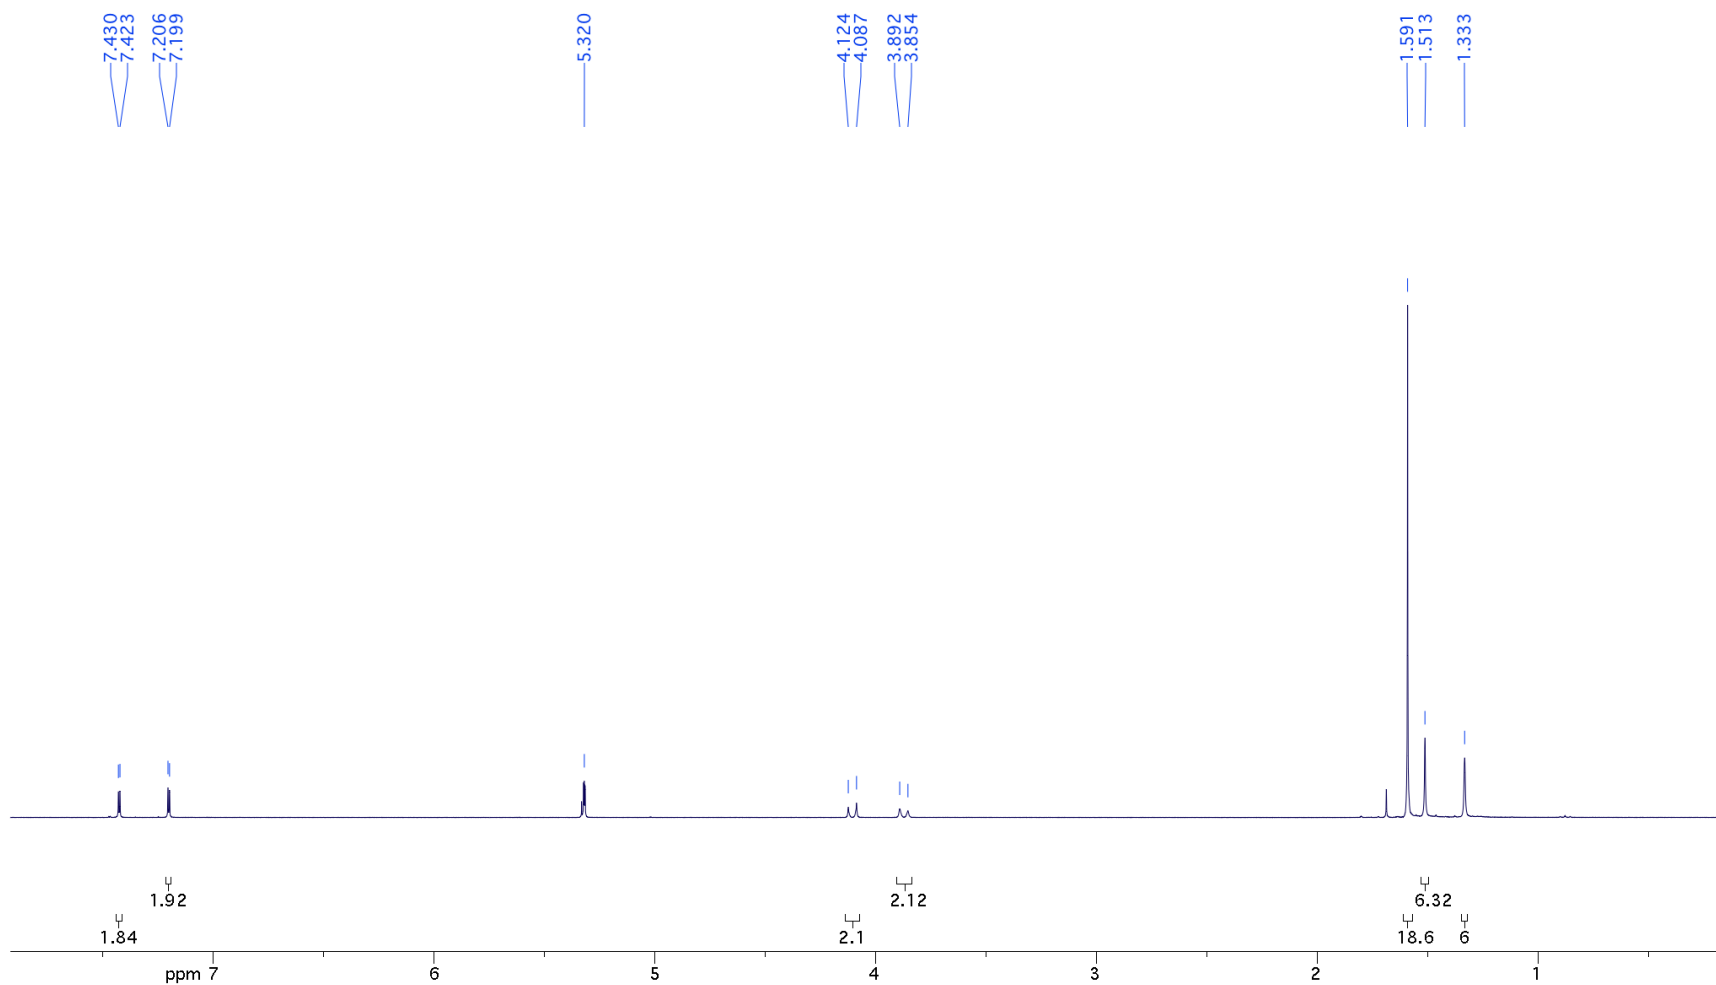



**3a**  $^{19}\text{F}\{^1\text{H}\}$  NMR

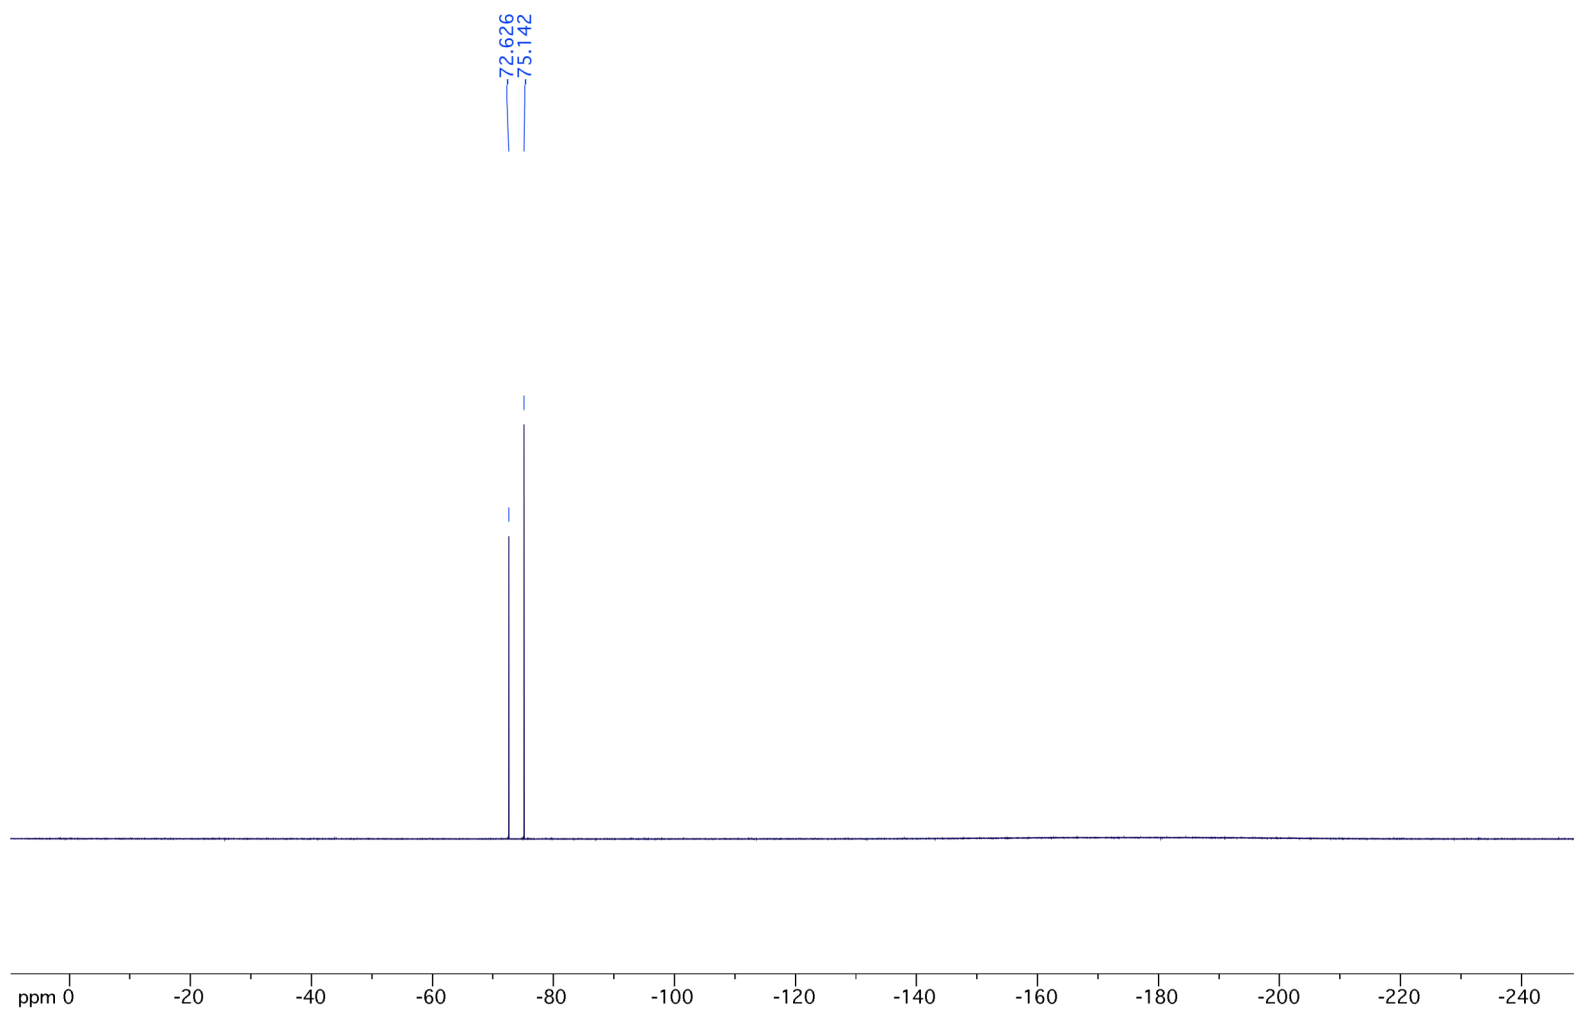

[IrCl(I'Bu')<sub>2</sub>] **2b**  
<sup>1</sup>H 300 MHz NMR C<sub>6</sub>D<sub>6</sub>

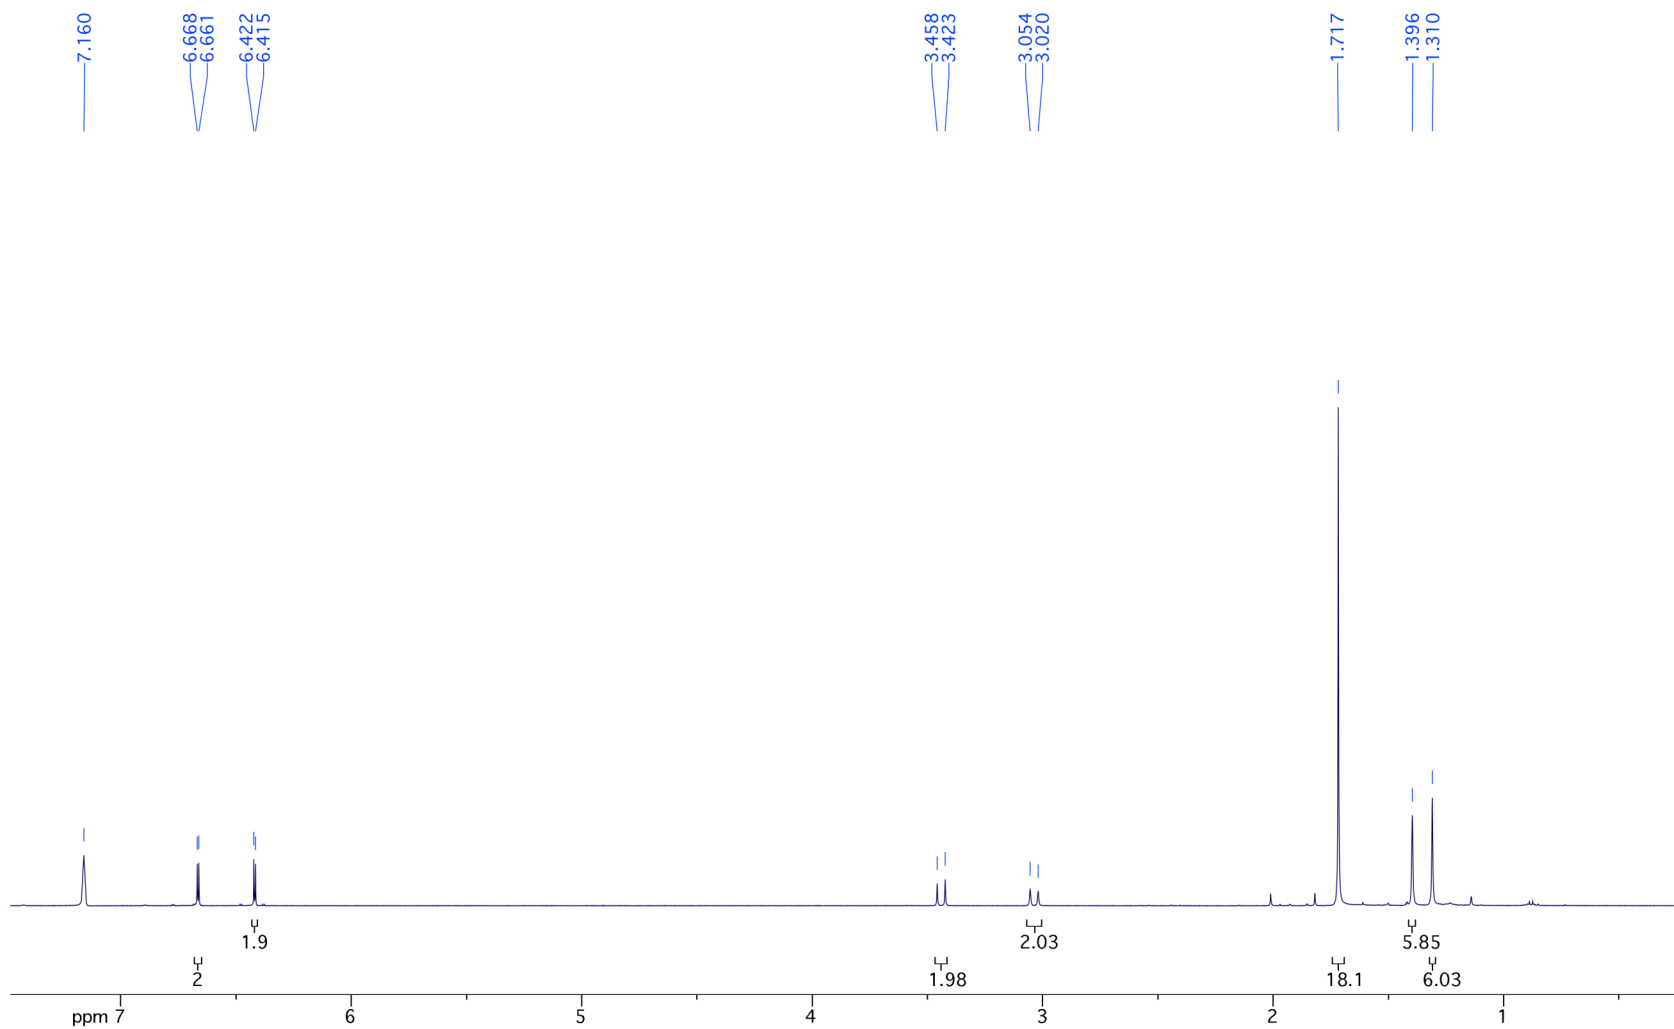

$[\text{Ir}(\text{tBu}')_2][\text{PF}_6]$  **3b**  
 $^1\text{H}$  300 MHz NMR  $\text{CD}_2\text{Cl}_2$

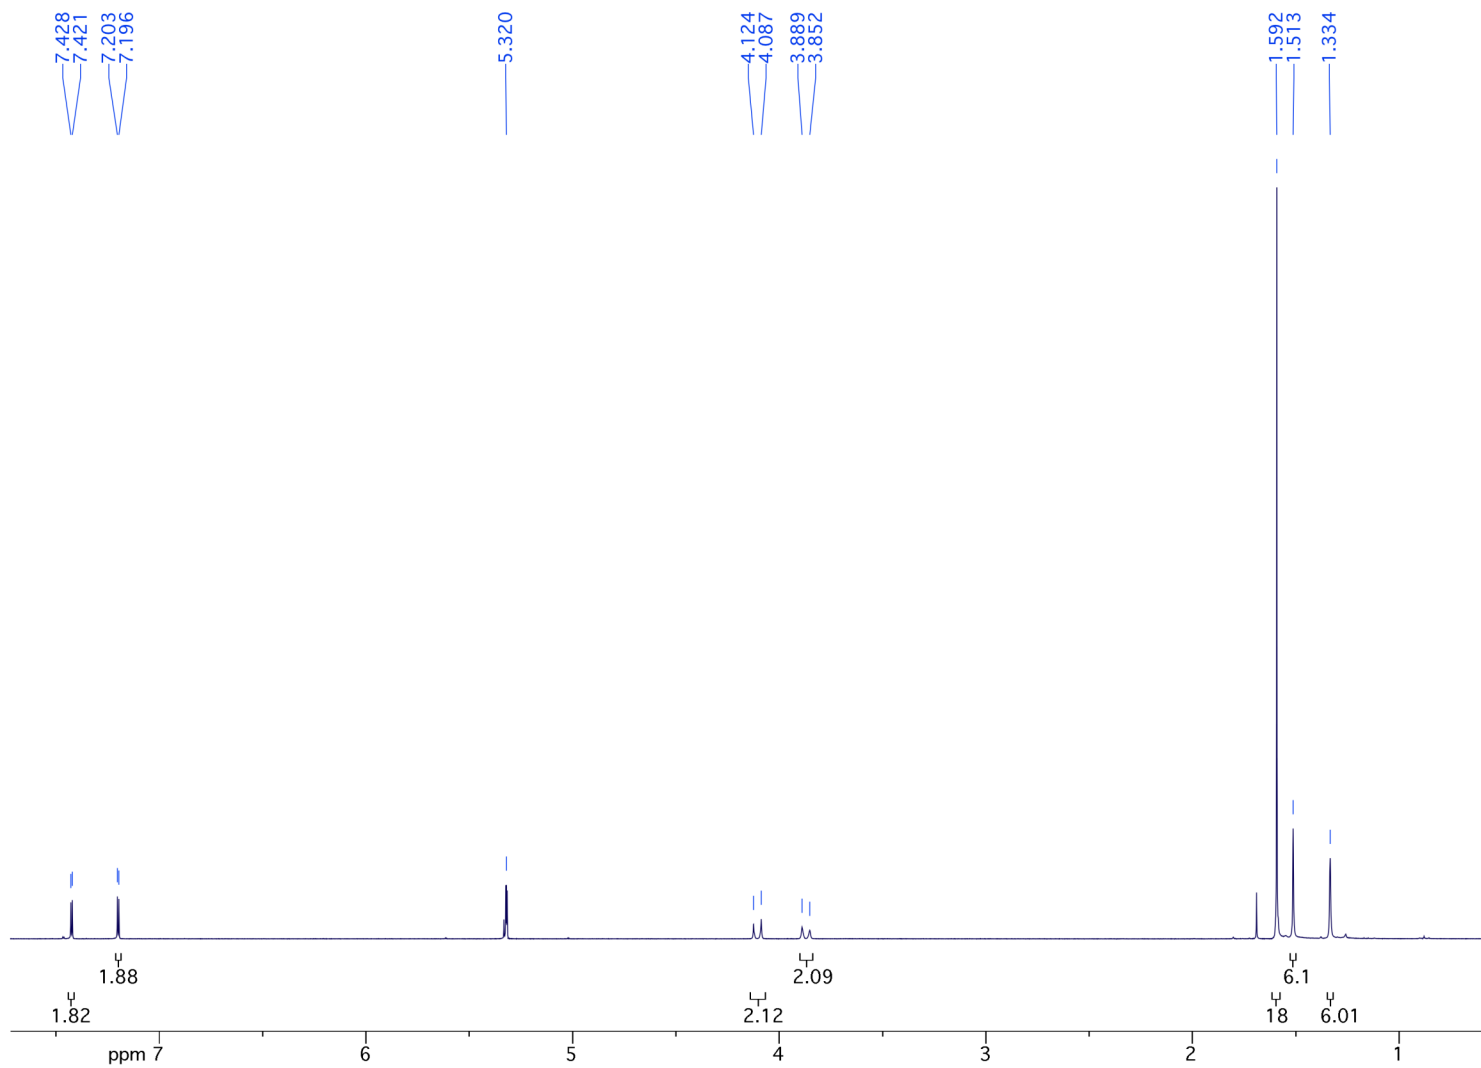

**3b**  $^{19}\text{F}\{^1\text{H}\}$   $\text{CD}_2\text{Cl}_2$

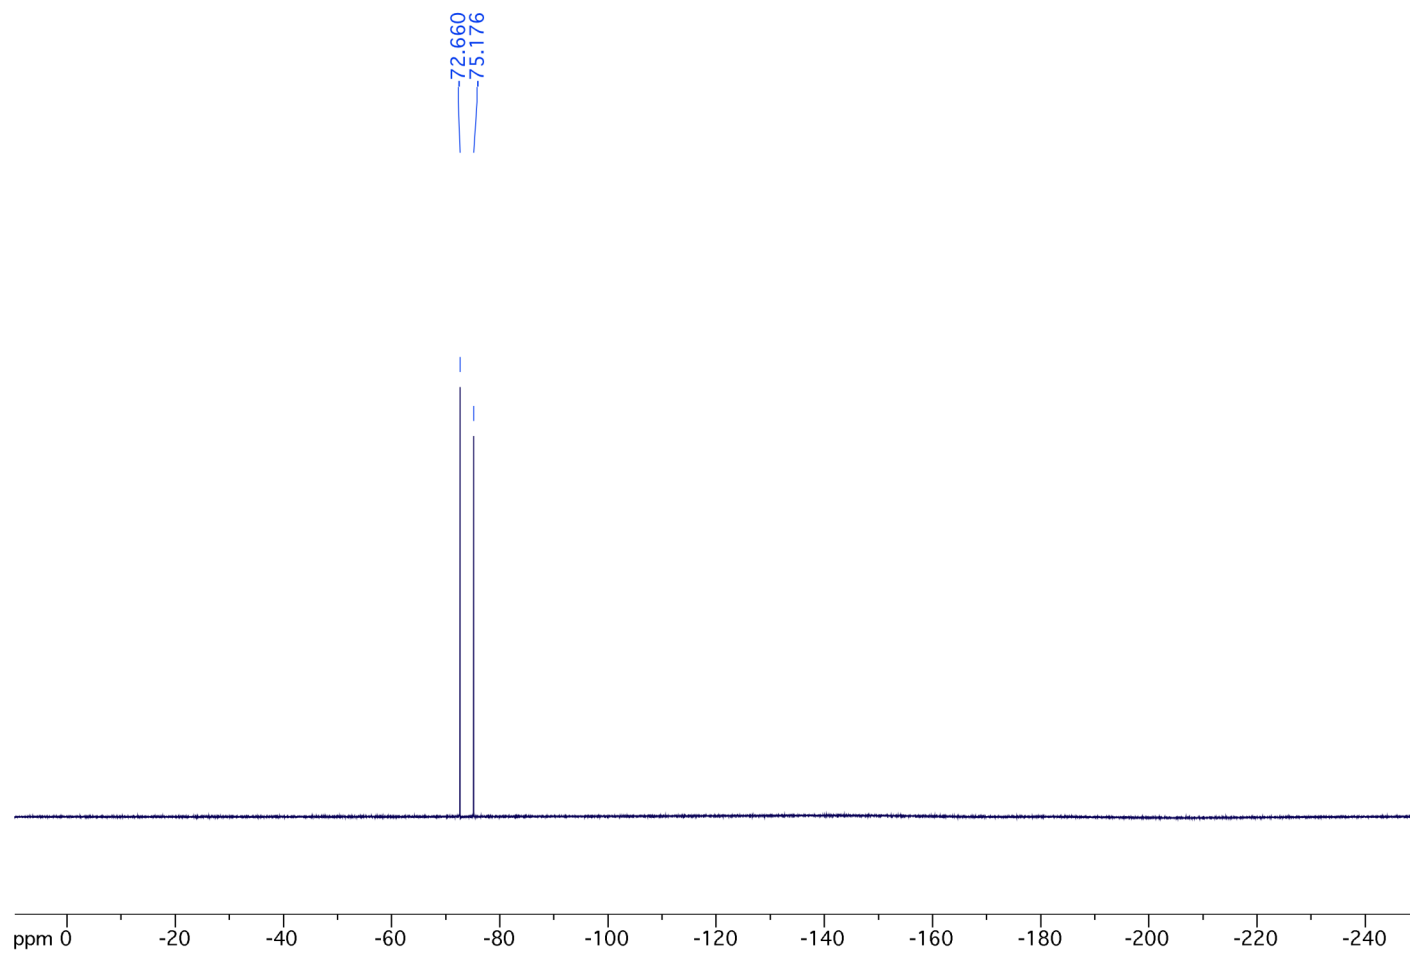

## DFT structures and energies

-----  
Information for structure h2

SCF Convergence : 0.2045D-12  
Maximum Force : 0.000008  
Energy E(RB-P86) : -1.17758869 a.u.  
ZPE-correction : 0.009840 a.u.  
Energy (298K) : -1.165389 a.u.  
Enthalpy (298K) : -1.164445 a.u.  
Free Energy (298K): -1.179259 a.u.

Atom Coordinates (x,y,z) in Angstrom  
H 0.000000 0.000000 0.375809  
H 0.000000 0.000000 -0.375809  
-----

Information for structure 2b

SCF Convergence : 0.4053D-08  
Maximum Force : 0.000010  
Energy E(RB-P86) : -1645.40538757 a.u.  
ZPE-correction : 0.555619 a.u.  
Energy (298K) : -1644.817012 a.u.  
Enthalpy (298K) : -1644.816068 a.u.  
Free Energy (298K): -1644.911644 a.u.

Atom Coordinates (x,y,z) in Angstrom  
Ir 0.023396 0.039920 -0.040299  
C 2.029517 0.056660 0.196987

|    |           |           |           |
|----|-----------|-----------|-----------|
| C  | -2.054181 | 0.300536  | -0.200622 |
| C1 | 0.365849  | -2.476982 | -0.301198 |
| N  | 3.158915  | 0.046236  | -0.586760 |
| N  | 2.496186  | 0.071441  | 1.484667  |
| N  | -3.260463 | -0.386422 | -0.266312 |
| N  | -2.438574 | 1.622503  | -0.315512 |
| C  | 4.300524  | 0.023943  | 0.223973  |
| C  | 3.882085  | 0.036149  | 1.520352  |
| C  | -4.322104 | 0.500952  | -0.424973 |
| C  | -3.806296 | 1.759770  | -0.452479 |
| C  | 3.219276  | -0.165630 | -2.070172 |
| C  | 4.283048  | 0.778577  | -2.662237 |
| C  | -1.465120 | 2.740611  | -0.217639 |
| C  | 1.530621  | -0.104561 | 2.598376  |
| C  | 1.876238  | 0.860893  | 3.743538  |
| C  | -3.459043 | -1.882600 | -0.208452 |
| C  | -2.868621 | -2.506123 | -1.484194 |
| H  | 4.061823  | 1.827232  | -2.413643 |
| H  | -1.785114 | -2.339215 | -1.538193 |
| H  | 1.906362  | 1.901094  | 3.386713  |
| H  | -5.351321 | 0.180384  | -0.503178 |
| H  | -4.302584 | 2.717814  | -0.553130 |
| C  | -2.799054 | -2.419714 | 1.070947  |
| C  | -4.964375 | -2.203750 | -0.150600 |
| C  | -1.760640 | 3.520980  | 1.078685  |
| C  | -1.645371 | 3.664830  | -1.437075 |
| C  | -0.043012 | 2.115151  | -0.200106 |
| H  | 0.543553  | 2.607917  | 0.596197  |
| H  | -3.360586 | -2.086385 | -2.375933 |
| H  | -3.038003 | -3.593588 | -1.475480 |
| H  | 0.462579  | 2.378380  | -1.149167 |
| H  | 4.453519  | 0.039415  | 2.441450  |
| H  | 5.305112  | 0.015834  | -0.180020 |
| C  | 0.119277  | 0.225186  | 2.013581  |

|   |           |           |           |
|---|-----------|-----------|-----------|
| C | 1.603360  | -1.566593 | 3.076393  |
| C | 1.860419  | 0.143966  | -2.713416 |
| C | 3.587521  | -1.641270 | -2.323798 |
| H | 4.290295  | 0.676222  | -3.757160 |
| H | 2.845833  | 0.619094  | 4.208319  |
| H | 1.107493  | 0.786971  | 4.527071  |
| H | 5.296138  | 0.541515  | -2.305710 |
| H | -0.620908 | -0.455611 | 2.461618  |
| H | -0.147255 | 1.258015  | 2.294361  |
| H | 0.909296  | -1.716503 | 3.917504  |
| H | 1.323680  | -2.244918 | 2.257068  |
| H | 2.617987  | -1.821622 | 3.421987  |
| H | -2.781121 | 3.937079  | 1.081349  |
| H | -1.652427 | 2.869696  | 1.957731  |
| H | -1.051914 | 4.356530  | 1.177470  |
| H | -2.641991 | 4.134850  | -1.466481 |
| H | -0.897362 | 4.470237  | -1.396503 |
| H | -1.497598 | 3.103746  | -2.371818 |
| H | 1.936796  | -0.041597 | -3.795858 |
| H | 1.075171  | -0.523929 | -2.318275 |
| H | 1.567167  | 1.191605  | -2.562530 |
| H | 3.648708  | -1.832529 | -3.406145 |
| H | 4.562899  | -1.887037 | -1.877062 |
| H | 2.821708  | -2.298880 | -1.886340 |
| H | -2.940245 | -3.509647 | 1.124096  |
| H | -1.720356 | -2.222636 | 1.068630  |
| H | -3.264417 | -1.965240 | 1.959795  |
| H | -5.068731 | -3.293520 | -0.055427 |
| H | -5.456160 | -1.746376 | 0.721696  |
| H | -5.495813 | -1.903637 | -1.066602 |

-----

Information for structure 2bh2cis

SCF Convergence : 0.8970D-08  
Maximum Force : 0.000004  
Energy E (RB-P86) -1646.59510766 a.u.  
ZPE-correction : 0.572540 a.u.  
Energy (298K) : -1645.989255 a.u.  
Enthalpy (298K) : -1645.988311 a.u.  
Free Energy (298K): -1646.083405 a.u.

Atom Coordinates (x,y,z) in Angstrom

|    |           |           |           |
|----|-----------|-----------|-----------|
| Ir | 0.008976  | 0.065588  | -0.106186 |
| C  | 2.035953  | -0.189461 | 0.204738  |
| C  | -2.067219 | 0.431182  | -0.003470 |
| Cl | 0.228498  | -2.162509 | -1.394806 |
| N  | 3.256652  | 0.141905  | -0.357508 |
| N  | 2.365364  | -0.909478 | 1.322325  |
| N  | -3.305591 | -0.128887 | -0.272724 |
| N  | -2.379253 | 1.644937  | 0.568896  |
| C  | 4.296653  | -0.387448 | 0.410358  |
| C  | 3.735245  | -1.048149 | 1.458297  |
| C  | -4.325852 | 0.736355  | 0.124574  |
| C  | -3.744019 | 1.849361  | 0.645919  |
| C  | 3.479454  | 0.898871  | -1.640446 |
| C  | 4.988832  | 1.034925  | -1.913064 |
| C  | -1.320555 | 2.635519  | 0.901474  |
| C  | 1.323528  | -1.554149 | 2.170493  |
| C  | 1.587066  | -1.187583 | 3.642140  |
| C  | -3.588772 | -1.444681 | -0.964329 |
| C  | -3.019318 | -1.378361 | -2.390814 |
| H  | 5.507627  | 1.598299  | -1.122606 |
| H  | -1.925768 | -1.284243 | -2.372398 |
| H  | 1.570903  | -0.096514 | 3.783399  |
| H  | -5.374211 | 0.495807  | 0.021523  |
| H  | -4.189095 | 2.741658  | 1.069266  |



|   |           |           |           |
|---|-----------|-----------|-----------|
| C | -2.973135 | -2.589930 | -0.147249 |
| C | -5.110818 | -1.665744 | -1.048076 |
| C | -1.682423 | 3.360637  | 2.209613  |
| C | -1.234337 | 3.653102  | -0.253280 |
| C | -0.012906 | 1.829340  | 1.058276  |
| H | 0.093971  | 1.540905  | 2.117113  |
| H | -3.463976 | -0.535213 | -2.942656 |
| H | -3.262305 | -2.308947 | -2.925723 |
| H | 0.833059  | 2.498030  | 0.828456  |
| H | 4.198330  | -1.591968 | 2.272879  |
| H | 5.339578  | -0.253756 | 0.160221  |
| C | -0.056161 | -1.019463 | 1.694663  |
| C | 1.425640  | -3.078680 | 1.966767  |
| C | 2.897091  | 2.316379  | -1.494407 |
| C | 2.846279  | 0.109651  | -2.801261 |
| H | 5.113026  | 1.591362  | -2.852920 |
| H | 2.553907  | -1.573533 | 4.004734  |
| H | 0.797885  | -1.627011 | 4.269715  |
| H | 5.475804  | 0.057384  | -2.042798 |
| H | -0.726925 | -1.876860 | 1.544944  |
| H | -0.499615 | -0.399648 | 2.491385  |
| H | 0.679907  | -3.583344 | 2.599453  |
| H | 1.222859  | -3.326271 | 0.914642  |
| H | 2.421727  | -3.460384 | 2.245158  |
| H | -2.571616 | 4.004319  | 2.108263  |
| H | -1.859289 | 2.638483  | 3.020135  |
| H | -0.840850 | 4.004938  | 2.503591  |
| H | -2.199554 | 4.158003  | -0.415173 |
| H | -0.480820 | 4.420268  | -0.020000 |
| H | -0.946189 | 3.156463  | -1.190965 |
| H | 3.021961  | 2.869789  | -2.437124 |
| H | 1.831239  | 2.288953  | -1.242685 |
| H | 3.421203  | 2.865695  | -0.697305 |
| H | 2.896209  | 0.703740  | -3.726741 |

|   |           |           |           |
|---|-----------|-----------|-----------|
| H | 3.394786  | -0.830225 | -2.962453 |
| H | 1.804469  | -0.163009 | -2.597714 |
| H | -3.234854 | -3.551158 | -0.614998 |
| H | -1.878412 | -2.517949 | -0.133399 |
| H | -3.368847 | -2.585118 | 0.880309  |
| H | -5.279401 | -2.632410 | -1.542462 |
| H | -5.582465 | -1.718267 | -0.054643 |
| H | -5.616276 | -0.896234 | -1.651306 |
| H | -0.124880 | 0.541403  | -1.800621 |
| H | 0.229724  | 1.239577  | -1.412933 |

-----

Information for structure 2bh2cis-1b

SCF Convergence : 0.4748D-08  
Maximum Force : 0.000006  
Energy E(RB-P86) -1646.54933070 a.u.  
ZPE-correction : 0.572839 a.u.  
Energy (298K) : -1645.943586 a.u.  
Enthalpy (298K) : -1645.942641 a.u.  
Free Energy (298K): -1646.037068 a.u.

Atom Coordinates (x,y,z) in Angstrom

|    |           |           |           |
|----|-----------|-----------|-----------|
| Ir | 0.046592  | 0.019871  | -0.069737 |
| C  | 2.067557  | -0.326190 | 0.195085  |
| C  | -2.022534 | 0.388489  | 0.038822  |
| Cl | 0.215173  | -1.088008 | -2.175564 |
| N  | 3.293680  | 0.147499  | -0.251433 |
| N  | 2.400722  | -1.305278 | 1.100908  |
| N  | -3.192254 | -0.310331 | -0.252409 |
| N  | -2.502517 | 1.572018  | 0.608541  |
| C  | 4.330047  | -0.557829 | 0.362684  |
| C  | 3.768122  | -1.470264 | 1.202786  |

|   |           |           |           |
|---|-----------|-----------|-----------|
| C | -4.318287 | 0.439794  | 0.080275  |
| C | -3.891364 | 1.606826  | 0.615394  |
| C | 3.542999  | 1.306932  | -1.188707 |
| C | 5.057368  | 1.562112  | -1.304077 |
| C | -1.686911 | 2.750543  | 1.053061  |
| C | 1.333897  | -2.091187 | 1.792901  |
| C | 1.800185  | -2.417707 | 3.224447  |
| C | -3.352533 | -1.639468 | -0.959684 |
| C | -3.199067 | -1.401541 | -2.472704 |
| H | 5.514315  | 1.820408  | -0.336775 |
| H | -2.197406 | -1.021265 | -2.708856 |
| H | 2.053800  | -1.498537 | 3.774165  |
| H | -5.328210 | 0.086374  | -0.069175 |
| H | -4.464383 | 2.433385  | 1.012439  |
| C | -2.343542 | -2.658073 | -0.418737 |
| C | -4.764446 | -2.200952 | -0.684906 |
| C | -2.491389 | 3.587146  | 2.069902  |
| C | -1.358389 | 3.614947  | -0.178715 |
| C | -0.421432 | 2.263240  | 1.759622  |
| H | -0.652070 | 1.637876  | 2.631337  |
| H | -3.956287 | -0.682945 | -2.824286 |
| H | -3.346105 | -2.349148 | -3.013942 |
| H | 0.193468  | 3.120808  | 2.074206  |
| H | 4.232223  | -2.198000 | 1.857500  |
| H | 5.374351  | -0.357712 | 0.169789  |
| C | 0.080153  | -1.195662 | 1.774458  |
| C | 1.114226  | -3.391268 | 0.996210  |
| C | 2.881798  | 2.567957  | -0.605961 |
| C | 2.993040  | 0.980221  | -2.585711 |
| H | 5.203150  | 2.417143  | -1.979048 |
| H | 2.668441  | -3.098063 | 3.254061  |
| H | 0.975445  | -2.914623 | 3.755613  |
| H | 5.591999  | 0.705549  | -1.741290 |
| H | -0.814968 | -1.820574 | 1.914680  |

|   |           |           |           |
|---|-----------|-----------|-----------|
| H | 0.124260  | -0.517674 | 2.648393  |
| H | 0.322907  | -3.991002 | 1.470380  |
| H | 0.813171  | -3.157682 | -0.034598 |
| H | 2.033047  | -3.998867 | 0.964810  |
| H | -3.350764 | 4.096670  | 1.610263  |
| H | -2.846465 | 2.971749  | 2.909749  |
| H | -1.833487 | 4.369543  | 2.474465  |
| H | -2.285009 | 3.979424  | -0.647165 |
| H | -0.753686 | 4.486455  | 0.115695  |
| H | -0.797921 | 3.025157  | -0.917480 |
| H | 3.091412  | 3.428149  | -1.259747 |
| H | 1.795278  | 2.433071  | -0.541333 |
| H | 3.279020  | 2.788252  | 0.397088  |
| H | 3.182153  | 1.831472  | -3.258397 |
| H | 3.494614  | 0.093099  | -3.000613 |
| H | 1.916264  | 0.777829  | -2.557758 |
| H | -2.429478 | -3.587993 | -1.000512 |
| H | -1.315794 | -2.290098 | -0.498732 |
| H | -2.558985 | -2.887235 | 0.636168  |
| H | -4.803839 | -3.219878 | -1.095259 |
| H | -4.979539 | -2.264439 | 0.392572  |
| H | -5.560432 | -1.625290 | -1.180395 |
| H | 0.214825  | 1.232656  | -1.132305 |
| H | 0.240789  | 1.676284  | 1.050735  |

-----  
Information for structure 2bh2trans

SCF Convergence : 0.1559D-08  
Maximum Force : 0.000019  
Energy E(RB-P86) -1646.57864650 a.u.  
ZPE-correction : 0.573873 a.u.  
Energy (298K) : -1645.971598 a.u.

Enthalpy (298K) : -1645.970654 a.u.  
Free Energy (298K): -1646.065176 a.u.

Atom Coordinates (x, y, z) in Angstrom

|    |           |           |           |
|----|-----------|-----------|-----------|
| Ir | -0.000034 | -0.000002 | -0.074754 |
| C  | 2.054868  | 0.534412  | -0.112318 |
| C  | -2.054859 | -0.534460 | -0.112366 |
| Cl | -0.000090 | 0.000024  | 2.456380  |
| N  | 3.321526  | -0.035052 | -0.071908 |
| N  | 2.319388  | 1.875316  | -0.249184 |
| N  | -3.321522 | 0.034999  | -0.072022 |
| N  | -2.319339 | -1.875357 | -0.249278 |
| C  | 4.303328  | 0.946553  | -0.190183 |
| C  | 3.672252  | 2.144495  | -0.304971 |
| C  | -4.303298 | -0.946627 | -0.190373 |
| C  | -3.672194 | -2.144559 | -0.305134 |
| C  | 3.665861  | -1.494945 | 0.064132  |
| C  | 3.170983  | -2.217114 | -1.203831 |
| C  | -1.225250 | -2.869238 | -0.379613 |
| C  | 1.225369  | 2.869277  | -0.379467 |
| C  | 1.048753  | 3.212003  | -1.871690 |
| C  | -3.665880 | 1.494883  | 0.064057  |
| C  | -3.069239 | 2.017350  | 1.383063  |
| H  | 2.117273  | -1.998064 | -1.404312 |
| H  | -2.026232 | 1.715665  | 1.517525  |
| H  | 0.760741  | 2.319994  | -2.446750 |
| H  | -5.360851 | -0.725727 | -0.168675 |
| H  | -4.073605 | -3.145733 | -0.402110 |
| C  | -3.170880 | 2.217152  | -1.203803 |
| C  | -5.194073 | 1.680170  | 0.136712  |
| C  | -1.048648 | -3.211890 | -1.871853 |
| C  | -1.594935 | -4.143465 | 0.405464  |
| C  | 0.007019  | -2.192891 | 0.226333  |
| H  | 0.893344  | -2.730286 | -0.126552 |

|   |           |           |           |
|---|-----------|-----------|-----------|
| H | -3.638391 | 1.608892  | 2.231966  |
| H | -3.138333 | 3.115021  | 1.419711  |
| H | -0.036348 | -2.288419 | 1.319865  |
| H | 4.073687  | 3.145662  | -0.401907 |
| H | 5.360875  | 0.725632  | -0.168427 |
| C | -0.006913 | 2.193018  | 0.226514  |
| C | 1.595141  | 4.143461  | 0.405647  |
| C | 3.069072  | -2.017466 | 1.383052  |
| C | 5.194045  | -1.680248 | 0.136946  |
| H | 3.296665  | -3.304964 | -1.096286 |
| H | 1.978588  | 3.615507  | -2.302865 |
| H | 0.261160  | 3.971527  | -1.988926 |
| H | 3.759855  | -1.886866 | -2.073848 |
| H | 0.036578  | 2.288300  | 1.320059  |
| H | -0.893237 | 2.730548  | -0.126182 |
| H | 0.728639  | 4.820523  | 0.408323  |
| H | 1.840582  | 3.898608  | 1.448997  |
| H | 2.440795  | 4.691247  | -0.042349 |
| H | -1.978485 | -3.615364 | -2.303052 |
| H | -0.760615 | -2.319845 | -2.446845 |
| H | -0.261060 | -3.971412 | -1.989131 |
| H | -2.440582 | -4.691273 | -0.042520 |
| H | -0.728402 | -4.820487 | 0.408088  |
| H | -1.840351 | -3.898657 | 1.448832  |
| H | 3.138094  | -3.115143 | 1.419632  |
| H | 3.638175  | -1.609099 | 2.232032  |
| H | 2.026071  | -1.715732 | 1.517440  |
| H | 5.391370  | -2.754791 | 0.260750  |
| H | 5.705099  | -1.355942 | -0.782227 |
| H | 5.634286  | -1.163696 | 1.002548  |
| H | -3.296634 | 3.304989  | -1.096201 |
| H | -2.117134 | 1.998183  | -1.404191 |
| H | -3.759628 | 1.886932  | -2.073914 |
| H | -5.391426 | 2.754704  | 0.260546  |

|   |           |           |           |
|---|-----------|-----------|-----------|
| H | -5.705021 | 1.355901  | -0.782534 |
| H | -5.634402 | 1.163568  | 1.002239  |
| H | 0.232854  | -0.752483 | -1.446570 |
| H | -0.233323 | 0.753732  | -1.445752 |

-----

Information for structure 2bh2trans-1b

SCF Convergence : 0.5244D-08  
Maximum Force : 0.000002  
Energy E(RB-P86) -1646.57511692 a.u.  
ZPE-correction : 0.573103 a.u.  
Energy (298K) : -1645.969260 a.u.  
Enthalpy (298K) : -1645.968316 a.u.  
Free Energy (298K): -1646.061924 a.u.

Atom Coordinates (x,y,z) in Angstrom

|    |           |           |           |
|----|-----------|-----------|-----------|
| Ir | -0.015447 | -0.006683 | -0.071930 |
| C  | 2.050578  | 0.515217  | -0.109201 |
| C  | -2.056453 | -0.543099 | -0.113688 |
| Cl | -0.022558 | 0.095579  | 2.478180  |
| N  | 3.312276  | -0.062066 | -0.028988 |
| N  | 2.336623  | 1.853802  | -0.273504 |
| N  | -3.327422 | 0.017257  | -0.053882 |
| N  | -2.310657 | -1.880834 | -0.285617 |
| C  | 4.308072  | 0.904001  | -0.151901 |
| C  | 3.694787  | 2.104903  | -0.309224 |
| C  | -4.301430 | -0.970218 | -0.201243 |
| C  | -3.660882 | -2.159752 | -0.348660 |
| C  | 3.640569  | -1.523397 | 0.129797  |
| C  | 3.174869  | -2.247645 | -1.149293 |
| C  | -1.197423 | -2.847482 | -0.435705 |
| C  | 1.281035  | 2.877347  | -0.465369 |

|   |           |           |           |
|---|-----------|-----------|-----------|
| C | 1.149029  | 3.176444  | -1.972225 |
| C | -3.686552 | 1.469548  | 0.117812  |
| C | -3.034535 | 1.993374  | 1.408505  |
| H | 2.139916  | -1.994608 | -1.401130 |
| H | -1.978224 | 1.718704  | 1.486357  |
| H | 0.863976  | 2.269906  | -2.526276 |
| H | -5.360746 | -0.759252 | -0.171924 |
| H | -4.054554 | -3.161308 | -0.471609 |
| C | -3.265642 | 2.222051  | -1.159548 |
| C | -5.212294 | 1.628478  | 0.268434  |
| C | -0.999420 | -3.143395 | -1.935024 |
| C | -1.544170 | -4.150232 | 0.310567  |
| C | 0.013725  | -2.154185 | 0.200485  |
| H | 0.911174  | -2.676418 | -0.145863 |
| H | -3.542649 | 1.560041  | 2.283023  |
| H | -3.133982 | 3.088335  | 1.460832  |
| H | -0.048026 | -2.280478 | 1.291984  |
| H | 4.111002  | 3.098133  | -0.422321 |
| H | 5.362247  | 0.671963  | -0.103100 |
| C | 0.010178  | 2.268999  | 0.121988  |
| C | 1.658743  | 4.162629  | 0.297271  |
| C | 3.010373  | -2.027605 | 1.440972  |
| C | 5.165003  | -1.721977 | 0.243812  |
| H | 3.258823  | -3.337571 | -1.023574 |
| H | 2.096630  | 3.551085  | -2.389212 |
| H | 0.377336  | 3.944066  | -2.135363 |
| H | 3.813134  | -1.949463 | -1.995890 |
| H | 0.056502  | 2.282513  | 1.219262  |
| H | -0.850489 | 2.869414  | -0.195640 |
| H | 0.812503  | 4.863547  | 0.253570  |
| H | 1.867046  | 3.941549  | 1.353736  |
| H | 2.531504  | 4.673213  | -0.140787 |
| H | -1.916434 | -3.555111 | -2.385780 |
| H | -0.723049 | -2.227923 | -2.476767 |



|   |           |           |           |
|---|-----------|-----------|-----------|
| H | -0.194330 | -3.882247 | -2.065597 |
| H | -2.374303 | -4.703026 | -0.160010 |
| H | -0.663467 | -4.808825 | 0.301143  |
| H | -1.802945 | -3.941495 | 1.358693  |
| H | 3.042082  | -3.126851 | 1.477698  |
| H | 3.583541  | -1.638773 | 2.296426  |
| H | 1.976960  | -1.691555 | 1.565998  |
| H | 5.347395  | -2.796758 | 0.387322  |
| H | 5.703162  | -1.416005 | -0.666060 |
| H | 5.587889  | -1.198352 | 1.113848  |
| H | -3.430913 | 3.302917  | -1.034296 |
| H | -2.212208 | 2.050666  | -1.402325 |
| H | -3.869130 | 1.878112  | -2.013767 |
| H | -5.419527 | 2.695181  | 0.435781  |
| H | -5.763639 | 1.324258  | -0.634085 |
| H | -5.600344 | 1.077228  | 1.137444  |
| H | 0.140829  | -0.484937 | -1.580080 |
| H | -0.336491 | 1.158737  | -1.109527 |

-----  
Information for structure 1b

SCF Convergence : 0.6580D-08  
Maximum Force : 0.000022  
Energy E(RB-P86) -1646.60720594 a.u.  
ZPE-correction : 0.575419 a.u.  
Energy (298K) : -1645.998363 a.u.  
Enthalpy (298K) : -1645.997419 a.u.  
Free Energy (298K): -1646.092902 a.u.

Atom Coordinates (x,y,z) in Angstrom  
Ir 0.038880 0.040698 -0.018804  
C -2.015288 -0.130891 0.096574

|    |           |           |           |
|----|-----------|-----------|-----------|
| C  | 2.102654  | 0.363861  | 0.146903  |
| C1 | -0.177233 | -1.797353 | -1.789191 |
| N  | -2.618140 | -1.036511 | 0.959193  |
| N  | -3.087652 | 0.506565  | -0.510075 |
| N  | 3.340187  | -0.158824 | -0.205446 |
| N  | 2.430504  | 1.473258  | 0.899541  |
| C  | -4.003275 | -0.969338 | 0.869702  |
| C  | -4.295267 | -0.006935 | -0.038710 |
| C  | 4.367833  | 0.626859  | 0.315709  |
| C  | 3.795830  | 1.651625  | 1.004077  |
| C  | -1.940934 | -2.129305 | 1.731340  |
| C  | -0.477194 | -1.769559 | 2.005453  |
| C  | 1.374134  | 2.383510  | 1.408726  |
| C  | -3.029615 | 1.553950  | -1.600338 |
| C  | -2.317434 | 2.808556  | -1.068906 |
| C  | 3.609094  | -1.363771 | -1.076628 |
| C  | 2.922070  | -2.592980 | -0.461558 |
| H  | 0.126004  | -1.683184 | 1.058255  |
| H  | 1.831241  | -2.477533 | -0.468344 |
| H  | -1.291754 | 2.577550  | -0.762929 |
| H  | 5.414176  | 0.397337  | 0.173226  |
| H  | 4.249794  | 2.465987  | 1.555754  |
| C  | 3.105873  | -1.057961 | -2.496995 |
| C  | 5.124452  | -1.633970 | -1.134366 |
| C  | 1.254553  | 3.571965  | 0.435300  |
| C  | 1.757961  | 2.892579  | 2.809939  |
| C  | 0.083949  | 1.536248  | 1.450008  |
| H  | 3.282874  | -2.759351 | 0.565769  |
| H  | 3.163531  | -3.483026 | -1.062064 |
| H  | -5.259959 | 0.348578  | -0.370707 |
| H  | -4.666004 | -1.595920 | 1.452266  |
| C  | -2.324047 | 0.963592  | -2.832680 |
| C  | -4.459684 | 1.956411  | -2.007105 |
| C  | -2.652475 | -2.299206 | 3.088912  |

|   |           |           |           |
|---|-----------|-----------|-----------|
| C | -2.023398 | -3.427734 | 0.904429  |
| H | 0.004956  | -2.615373 | 2.520734  |
| H | -2.858841 | 3.224632  | -0.205047 |
| H | -2.285737 | 3.574912  | -1.858193 |
| H | -0.375898 | -0.882224 | 2.640738  |
| H | -4.380563 | 2.716737  | -2.796737 |
| H | -5.028193 | 1.110879  | -2.421600 |
| H | -5.024277 | 2.402416  | -1.173975 |
| H | 2.205722  | 4.122613  | 0.360231  |
| H | 0.978910  | 3.217932  | -0.567651 |
| H | 0.480417  | 4.270359  | 0.787138  |
| H | 2.639541  | 3.554386  | 2.796227  |
| H | 0.918063  | 3.472080  | 3.220741  |
| H | 1.958664  | 2.051875  | 3.490695  |
| H | -2.095280 | -3.026832 | 3.696759  |
| H | -2.694224 | -1.347765 | 3.639720  |
| H | -3.675173 | -2.687844 | 2.979486  |
| H | -1.557955 | -4.256577 | 1.460149  |
| H | -3.071870 | -3.695935 | 0.704080  |
| H | -1.501066 | -3.297111 | -0.055998 |
| H | 3.310191  | -1.917848 | -3.153065 |
| H | 2.022050  | -0.885015 | -2.500223 |
| H | 3.629096  | -0.178527 | -2.904503 |
| H | 5.279124  | -2.527403 | -1.755199 |
| H | 5.681798  | -0.809810 | -1.604853 |
| H | 5.551438  | -1.842231 | -0.141183 |
| H | -2.239760 | 1.737620  | -3.611292 |
| H | -1.324749 | 0.584197  | -2.588062 |
| H | -2.903966 | 0.121592  | -3.238783 |
| H | -0.780427 | 2.217890  | 1.395018  |
| H | 0.065273  | 1.107517  | -1.142237 |
| H | 0.029000  | 1.057248  | 2.448580  |

-----

Information for structure lbh2cis

SCF Convergence : 0.4546D-08  
Maximum Force : 0.000014  
Energy E(RB-P86) -1647.77211864 a.u.  
ZPE-correction : 0.593319 a.u.  
Energy (298K) : -1647.144560 a.u.  
Enthalpy (298K) : -1647.143616 a.u.  
Free Energy (298K): -1647.240550 a.u.

Atom Coordinates (x,y,z) in Angstrom

|    |           |           |           |
|----|-----------|-----------|-----------|
| Ir | -0.091546 | 0.077771  | -0.110656 |
| C  | -2.145820 | 0.353664  | 0.183647  |
| C  | 2.013638  | -0.184246 | 0.048103  |
| Cl | 0.080619  | -1.573178 | -2.072451 |
| N  | -2.455435 | 1.366429  | 1.064489  |
| N  | -3.381990 | -0.176031 | -0.149766 |
| N  | 2.690343  | -1.121609 | 0.840144  |
| N  | 3.056308  | 0.566214  | -0.508488 |
| C  | -3.817855 | 1.490482  | 1.258709  |
| C  | -4.399606 | 0.521551  | 0.501886  |
| C  | 4.063694  | -0.920030 | 0.776654  |
| C  | 4.290291  | 0.119568  | -0.054661 |
| C  | -1.390890 | 2.222828  | 1.647418  |
| C  | -1.322516 | 3.532359  | 0.838172  |
| C  | 2.990016  | 1.688970  | -1.526710 |
| C  | -3.666000 | -1.326526 | -1.089988 |
| C  | -3.264037 | -0.909958 | -2.514220 |
| C  | 2.151697  | -2.287297 | 1.668045  |
| C  | 1.371433  | -1.759106 | 2.886557  |
| H  | -1.075079 | 3.332340  | -0.213727 |
| H  | 0.474215  | -1.206952 | 2.591049  |
| H  | -2.181646 | -0.741268 | -2.586257 |

|   |           |           |           |
|---|-----------|-----------|-----------|
| H | 4.781405  | -1.521106 | 1.313108  |
| H | 5.231407  | 0.557528  | -0.350770 |
| C | 1.335105  | -3.238248 | 0.777507  |
| C | 3.331585  | -3.113905 | 2.228247  |
| C | 4.416575  | 2.117397  | -1.936254 |
| C | 2.341754  | 2.933602  | -0.888082 |
| C | 2.299480  | 1.184456  | -2.810716 |
| H | 2.048166  | 2.039272  | -3.457598 |
| H | 2.989950  | 0.530480  | -3.364689 |
| H | 1.398077  | 0.593624  | -2.620622 |
| H | 2.011078  | -1.098976 | 3.492580  |
| H | 1.064325  | -2.609883 | 3.513880  |
| H | -5.445514 | 0.274020  | 0.391256  |
| H | -4.260565 | 2.227885  | 1.917348  |
| C | -2.904415 | -2.567843 | -0.600191 |
| C | -5.173307 | -1.643951 | -1.076188 |
| C | -0.090465 | 1.393994  | 1.544165  |
| C | -1.728408 | 2.539709  | 3.115480  |
| H | -0.551682 | 4.194773  | 1.259687  |
| H | -3.811764 | -0.002891 | -2.815308 |
| H | -3.519724 | -1.717145 | -3.217563 |
| H | -2.285303 | 4.066498  | 0.865981  |
| H | -5.336972 | -2.503547 | -1.740923 |
| H | -5.532281 | -1.927325 | -0.074853 |
| H | -5.783649 | -0.812605 | -1.460928 |
| H | 4.989488  | 2.548243  | -1.101286 |
| H | 4.987073  | 1.292293  | -2.386224 |
| H | 4.314331  | 2.899731  | -2.701969 |
| H | 2.974201  | 3.302408  | -0.065621 |
| H | 2.255628  | 3.732380  | -1.640019 |
| H | 1.347890  | 2.736216  | -0.476557 |
| H | 0.764504  | 2.090237  | 1.520962  |
| H | 0.016941  | 0.810377  | 2.472562  |
| H | 0.131130  | 1.600021  | -1.097541 |

|   |           |           |           |
|---|-----------|-----------|-----------|
| H | -0.878313 | 3.071284  | 3.567982  |
| H | -2.615385 | 3.186058  | 3.220472  |
| H | -1.896378 | 1.614847  | 3.686652  |
| H | 0.907614  | -4.036087 | 1.404594  |
| H | 0.529501  | -2.729341 | 0.240178  |
| H | 1.987987  | -3.701705 | 0.022937  |
| H | 2.899917  | -3.968159 | 2.768428  |
| H | 3.972813  | -3.520472 | 1.432748  |
| H | 3.946752  | -2.551546 | 2.947064  |
| H | -3.121364 | -3.414193 | -1.269135 |
| H | -1.821502 | -2.398171 | -0.615821 |
| H | -3.226214 | -2.836546 | 0.418199  |
| H | -0.212553 | -1.087771 | 0.938270  |
| H | -0.366269 | 1.111016  | -1.566473 |

-----  
Information for structure lbh2cis-4

SCF Convergence : 0.8190D-08  
Maximum Force : 0.000001  
Energy E(RB-P86) -1647.74314969 a.u.  
ZPE-correction : 0.591370 a.u.  
Energy (298K) : -1647.117748 a.u.  
Enthalpy (298K) : -1647.116804 a.u.  
Free Energy (298K): -1647.214375 a.u.

Atom Coordinates (x,y,z) in Angstrom  
Ir -0.112146 -0.012417 -0.000960  
C -2.145596 0.331623 -0.221915  
C 1.991782 -0.221634 -0.097620  
Cl -0.146205 -0.783950 2.438725  
N -2.463661 1.493881 -0.891353  
N -3.376324 -0.247121 0.041409

|   |           |           |           |
|---|-----------|-----------|-----------|
| N | 2.985699  | 0.703053  | 0.245441  |
| N | 2.680977  | -1.159093 | -0.879440 |
| C | -3.830268 | 1.642018  | -1.050533 |
| C | -4.401475 | 0.562489  | -0.457183 |
| C | 4.180542  | 0.393459  | -0.402351 |
| C | 3.993777  | -0.753517 | -1.088991 |
| C | -1.419336 | 2.377581  | -1.477965 |
| C | -1.269684 | 2.034401  | -2.973468 |
| C | 2.250107  | -2.566267 | -1.282724 |
| C | -3.704578 | -1.454861 | 0.899134  |
| C | -2.700915 | -2.592219 | 0.672068  |
| C | 3.114135  | 1.751999  | 1.354762  |
| C | 3.581988  | 3.072136  | 0.709257  |
| H | -0.918930 | 1.000978  | -3.100442 |
| H | 2.852006  | 3.416097  | -0.037860 |
| H | -1.706040 | -2.331315 | 1.048345  |
| H | 5.074309  | 0.995676  | -0.311574 |
| H | 4.694678  | -1.297920 | -1.704118 |
| C | 1.854242  | 2.022662  | 2.180189  |
| C | 4.179482  | 1.213437  | 2.341777  |
| C | 3.473219  | -3.337352 | -1.827414 |
| C | 1.202801  | -2.545225 | -2.410913 |
| C | 1.775256  | -3.314443 | -0.021764 |
| H | 1.407774  | -4.311926 | -0.308580 |
| H | 2.616180  | -3.444686 | 0.676820  |
| H | 0.976195  | -2.778487 | 0.502187  |
| H | 4.563564  | 2.988968  | 0.220543  |
| H | 3.664606  | 3.844177  | 1.488585  |
| H | -5.447861 | 0.316397  | -0.348214 |
| H | -4.284013 | 2.486466  | -1.554640 |
| C | -3.706406 | -1.006099 | 2.371727  |
| C | -5.105190 | -1.975102 | 0.510896  |
| C | -0.103150 | 2.133545  | -0.698585 |
| C | -1.855769 | 3.846999  | -1.325603 |

|   |           |           |           |
|---|-----------|-----------|-----------|
| H | -0.541512 | 2.713426  | -3.442007 |
| H | -2.631156 | -2.852366 | -0.394534 |
| H | -3.056145 | -3.476702 | 1.222449  |
| H | -2.230618 | 2.144222  | -3.499738 |
| H | -5.277347 | -2.917296 | 1.049549  |
| H | -5.915430 | -1.290608 | 0.802049  |
| H | -5.179620 | -2.184342 | -0.567213 |
| H | 3.851406  | -2.924626 | -2.775475 |
| H | 4.294433  | -3.391617 | -1.097940 |
| H | 3.145158  | -4.366293 | -2.030758 |
| H | 1.577076  | -1.964470 | -3.268573 |
| H | 1.025458  | -3.577761 | -2.750054 |
| H | 0.253678  | -2.115129 | -2.081523 |
| H | 0.755765  | 2.179895  | -1.380065 |
| H | 0.022946  | 2.967264  | 0.010475  |
| H | -0.053867 | -0.083685 | -1.589668 |
| H | -1.039070 | 4.499081  | -1.668348 |
| H | -2.744309 | 4.089329  | -1.929559 |
| H | -2.068647 | 4.085044  | -0.272929 |
| H | 2.168382  | 2.608338  | 3.058447  |
| H | 1.125576  | 2.635612  | 1.637115  |
| H | 1.370200  | 1.101651  | 2.534456  |
| H | 4.339073  | 1.953130  | 3.139992  |
| H | 3.826550  | 0.279797  | 2.803194  |
| H | 5.148783  | 1.020145  | 1.862839  |
| H | -3.990297 | -1.853452 | 3.015111  |
| H | -2.703414 | -0.667843 | 2.669755  |
| H | -4.433787 | -0.194264 | 2.530286  |
| H | -0.029991 | 1.356611  | 0.845268  |
| H | -0.297652 | -1.603043 | -0.217123 |

-----  
Information for structure 1bh2trans



SCF Convergence : 0.4465D-08  
Maximum Force : 0.000026  
Energy E (RB-P86) -1647.77267990 a.u.  
ZPE-correction : 0.592066 a.u.  
Energy (298K) : -1647.145947 a.u.  
Enthalpy (298K) : -1647.145003 a.u.  
Free Energy (298K): -1647.244326 a.u.

Atom Coordinates (x,y,z) in Angstrom

|    |           |           |           |
|----|-----------|-----------|-----------|
| Ir | 0.089847  | 0.026017  | -0.178080 |
| C  | 2.098390  | 0.075495  | 0.264985  |
| C  | -2.069485 | 0.202797  | -0.212132 |
| H  | 0.246999  | 0.639374  | -1.802857 |
| N  | 2.413987  | -0.109618 | 1.584071  |
| N  | 3.321335  | 0.256408  | -0.356695 |
| N  | -2.785339 | 1.386789  | 0.054883  |
| N  | -3.074381 | -0.764825 | -0.232939 |
| C  | 3.780847  | -0.078247 | 1.793345  |
| C  | 4.351833  | 0.154483  | 0.581374  |
| C  | -4.131021 | 1.110034  | 0.263305  |
| C  | -4.307871 | -0.217166 | 0.087622  |
| C  | 1.370036  | -0.386477 | 2.608507  |
| C  | 1.569243  | -1.824688 | 3.123686  |
| C  | -2.994845 | -2.236371 | -0.619756 |
| C  | 3.565682  | 0.509555  | -1.821901 |
| C  | 3.051758  | -0.687901 | -2.640696 |
| C  | -2.336408 | 2.844533  | 0.036202  |
| C  | -1.529109 | 3.185305  | 1.303174  |
| H  | 1.457469  | -2.534770 | 2.291619  |
| H  | -0.611020 | 2.593692  | 1.378282  |
| H  | 2.003935  | -0.920706 | -2.424012 |
| H  | -4.866303 | 1.860150  | 0.510213  |
| H  | -5.216305 | -0.796126 | 0.159360  |

|    |           |           |           |
|----|-----------|-----------|-----------|
| C  | -1.580244 | 3.148905  | -1.270501 |
| C  | -3.576258 | 3.769672  | 0.037365  |
| C  | -4.419115 | -2.775609 | -0.881685 |
| C  | -2.393052 | -3.037359 | 0.543913  |
| C  | -2.218535 | -2.372128 | -1.938097 |
| H  | -2.218394 | -3.428453 | -2.245754 |
| H  | -2.708237 | -1.780269 | -2.727758 |
| H  | -1.172567 | -2.069405 | -1.828003 |
| H  | -2.138473 | 3.001028  | 2.201091  |
| H  | -1.257569 | 4.252074  | 1.286357  |
| H  | 5.396111  | 0.252950  | 0.321489  |
| H  | 4.235018  | -0.221231 | 2.766462  |
| C  | 2.889498  | 1.835265  | -2.218894 |
| C  | 5.076862  | 0.654656  | -2.080926 |
| C  | -0.010059 | -0.223873 | 1.914453  |
| C  | 1.536389  | 0.626830  | 3.756572  |
| H  | 0.808819  | -2.047493 | 3.887313  |
| H  | 3.633618  | -1.589798 | -2.401289 |
| H  | 3.163877  | -0.473762 | -3.714910 |
| H  | 2.561912  | -1.959035 | 3.584292  |
| H  | 5.218554  | 0.841310  | -3.154927 |
| H  | 5.514827  | 1.504482  | -1.535921 |
| H  | 5.629444  | -0.262681 | -1.830121 |
| H  | -5.033596 | -2.828899 | 0.029707  |
| H  | -4.953322 | -2.196944 | -1.650443 |
| H  | -4.311634 | -3.803915 | -1.253525 |
| H  | -2.997139 | -2.891008 | 1.453555  |
| H  | -2.401514 | -4.109107 | 0.293162  |
| H  | -1.349321 | -2.756410 | 0.726274  |
| H  | -0.606927 | -1.130186 | 2.095845  |
| H  | -0.551792 | 0.611534  | 2.384700  |
| Cl | 0.761855  | -2.535670 | -0.406277 |
| H  | 0.747860  | 0.460325  | 4.505261  |
| H  | 2.508079  | 0.525196  | 4.266604  |

|   |           |           |           |
|---|-----------|-----------|-----------|
| H | 1.445850  | 1.657991  | 3.382698  |
| H | -1.303620 | 4.214081  | -1.286791 |
| H | -0.670188 | 2.550948  | -1.364309 |
| H | -2.226771 | 2.946697  | -2.138092 |
| H | -3.214396 | 4.802672  | -0.060711 |
| H | -4.246787 | 3.569597  | -0.810920 |
| H | -4.147157 | 3.716979  | 0.975833  |
| H | 3.023289  | 2.013271  | -3.296557 |
| H | 1.816807  | 1.822633  | -1.995550 |
| H | 3.341370  | 2.675380  | -1.669334 |
| H | 0.049294  | 1.565852  | 0.098055  |
| H | 0.053745  | -0.222499 | -1.912269 |

-----

Information for structure lbh2trans-4

SCF Convergence : 0.4734D-08  
Maximum Force : 0.000003  
Energy E(RB-P86) -1647.75710497 a.u.  
ZPE-correction : 0.591327 a.u.  
Energy (298K) : -1647.131557 a.u.  
Enthalpy (298K) : -1647.130613 a.u.  
Free Energy (298K): -1647.228783 a.u.

Atom Coordinates (x,y,z) in Angstrom

|    |           |           |           |
|----|-----------|-----------|-----------|
| Ir | 0.068982  | 0.014561  | -0.018596 |
| C  | 2.118003  | 0.151395  | 0.076799  |
| C  | -2.099704 | -0.002584 | 0.143481  |
| H  | -0.053674 | -1.213721 | 1.028349  |
| N  | 2.726788  | 1.007525  | -0.807394 |
| N  | 3.159995  | -0.394510 | 0.799096  |
| N  | -2.986837 | -1.068954 | -0.002499 |
| N  | -2.870681 | 0.947068  | 0.846623  |

|   |           |           |           |
|---|-----------|-----------|-----------|
| C | 4.102889  | 0.998207  | -0.657400 |
| C | 4.375923  | 0.120292  | 0.343708  |
| C | -4.187792 | -0.819651 | 0.643922  |
| C | -4.118285 | 0.423196  | 1.167386  |
| C | 1.965045  | 1.884165  | -1.742450 |
| C | 2.035370  | 3.325863  | -1.201000 |
| C | -2.605446 | 2.420900  | 1.132535  |
| C | 3.071658  | -1.431356 | 1.897158  |
| C | 2.205101  | -0.884724 | 3.045502  |
| C | -2.839167 | -2.319777 | -0.857276 |
| C | -2.497792 | -1.877921 | -2.289114 |
| H | 1.566512  | 3.390650  | -0.207711 |
| H | -1.560975 | -1.313408 | -2.326546 |
| H | 1.181183  | -0.688662 | 2.710102  |
| H | -5.002400 | -1.527114 | 0.682028  |
| H | -4.865294 | 0.957339  | 1.733730  |
| C | -1.817836 | -3.276890 | -0.226012 |
| C | -4.188853 | -3.067678 | -0.922783 |
| C | -3.888400 | 3.082593  | 1.688083  |
| C | -2.280524 | 3.139367  | -0.187201 |
| C | -1.514383 | 2.629018  | 2.201089  |
| H | -1.531569 | 3.680772  | 2.526448  |
| H | -1.709434 | 1.996354  | 3.079761  |
| H | -0.512080 | 2.400162  | 1.828858  |
| H | -3.322025 | -1.271881 | -2.698449 |
| H | -2.368747 | -2.766861 | -2.924282 |
| H | 5.330597  | -0.176342 | 0.753371  |
| H | 4.770974  | 1.595318  | -1.266001 |
| C | 2.503694  | -2.736743 | 1.316128  |
| C | 4.480707  | -1.711656 | 2.451654  |
| C | 0.513793  | 1.375672  | -1.791323 |
| C | 2.601856  | 1.800828  | -3.142846 |
| H | 1.507024  | 4.008766  | -1.882957 |
| H | 2.634085  | 0.047554  | 3.444855  |

|    |           |           |           |
|----|-----------|-----------|-----------|
| H  | 2.172062  | -1.625432 | 3.858940  |
| H  | 3.077021  | 3.671274  | -1.111267 |
| H  | 4.383013  | -2.452763 | 3.257211  |
| H  | 5.150453  | -2.140935 | 1.691684  |
| H  | 4.947038  | -0.812541 | 2.882751  |
| H  | -4.743058 | 2.984685  | 1.003554  |
| H  | -4.168564 | 2.698773  | 2.680372  |
| H  | -3.678491 | 4.155158  | 1.802115  |
| H  | -3.137383 | 3.082175  | -0.875600 |
| H  | -2.068767 | 4.200580  | 0.014152  |
| H  | -1.413621 | 2.700230  | -0.685840 |
| H  | -0.144071 | 2.206178  | -2.086202 |
| H  | 0.403254  | 0.575817  | -2.533770 |
| H  | 0.011592  | 1.606777  | -0.203498 |
| H  | 1.990743  | 2.377978  | -3.852228 |
| H  | 3.621447  | 2.218718  | -3.166072 |
| H  | 2.633016  | 0.756002  | -3.482064 |
| H  | -1.760398 | -4.194105 | -0.831240 |
| H  | -0.817300 | -2.837191 | -0.191636 |
| H  | -2.141026 | -3.550701 | 0.790971  |
| H  | -4.049557 | -3.920588 | -1.601579 |
| H  | -4.499376 | -3.477018 | 0.050866  |
| H  | -4.997786 | -2.446171 | -1.335445 |
| H  | 2.418267  | -3.486175 | 2.118165  |
| H  | 1.517951  | -2.576969 | 0.864749  |
| H  | 3.168945  | -3.132209 | 0.534668  |
| Cl | 0.763243  | -1.778179 | -1.791505 |
| H  | -0.046339 | 0.634374  | 1.421185  |

-----

Information for structure 4-2h

SCF Convergence : 0.7763D-08

Maximum Force : 0.000012  
Energy E (RB-P86) -1647.78896012 a.u.  
ZPE-correction : 0.595303 a.u.  
Energy (298K) : -1647.158733 a.u.  
Enthalpy (298K) : -1647.157788 a.u.  
Free Energy (298K): -1647.257420 a.u.

Atom Coordinates (x,y,z) in Angstrom

|    |           |           |           |
|----|-----------|-----------|-----------|
| Ir | -0.012512 | -0.032676 | -0.125990 |
| C  | 2.106713  | 0.027665  | -0.141866 |
| C  | -2.103102 | 0.013267  | -0.180348 |
| Cl | -0.057598 | -0.390186 | 2.404429  |
| N  | 3.004872  | -1.000623 | -0.437686 |
| N  | 2.957214  | 1.122132  | 0.065734  |
| N  | -2.961585 | -1.068031 | 0.003329  |
| N  | -2.988260 | 1.079286  | -0.367295 |
| C  | 4.317944  | -0.554047 | -0.421812 |
| C  | 4.287820  | 0.762079  | -0.113435 |
| C  | -4.292721 | -0.675973 | -0.032259 |
| C  | -4.309383 | 0.656189  | -0.267632 |
| C  | 2.680139  | -2.455639 | -0.654808 |
| C  | 1.708346  | -2.576688 | -1.839729 |
| C  | -2.653491 | 2.530414  | -0.621943 |
| C  | 2.605855  | 2.553232  | 0.424804  |
| C  | 1.930039  | 3.227812  | -0.784271 |
| C  | -2.613565 | -2.493871 | 0.313303  |
| C  | -1.204742 | -2.793790 | -0.185083 |
| H  | 0.852192  | -1.897839 | -1.726064 |
| H  | -0.459184 | -2.180977 | 0.359001  |
| H  | 1.031634  | 2.691810  | -1.107436 |
| H  | -5.116258 | -1.363323 | 0.106442  |
| H  | -5.154733 | 1.319707  | -0.374571 |
| C  | -2.723430 | -2.715258 | 1.833585  |
| C  | -3.589960 | -3.425901 | -0.437169 |

|   |           |           |           |
|---|-----------|-----------|-----------|
| C | -1.930802 | 3.098459  | 0.612331  |
| C | -3.946329 | 3.348020  | -0.816671 |
| C | -1.843001 | 2.643234  | -1.925461 |
| H | -1.121687 | -2.640486 | -1.267222 |
| H | -0.947123 | -3.838603 | 0.046187  |
| H | 5.111295  | 1.451770  | -0.006206 |
| H | 5.167263  | -1.191097 | -0.621189 |
| C | 1.761776  | 2.577353  | 1.708157  |
| C | 3.893146  | 3.353377  | 0.722811  |
| C | 2.151487  | -3.027730 | 0.675078  |
| C | 3.953276  | -3.240686 | -1.030866 |
| H | 1.350042  | -3.612931 | -1.930595 |
| H | 2.626660  | 3.262178  | -1.636438 |
| H | 1.649817  | 4.260025  | -0.524953 |
| H | 2.222883  | -2.302950 | -2.774109 |
| H | 3.587268  | 4.361160  | 1.037996  |
| H | 4.473061  | 2.912724  | 1.546843  |
| H | 4.539089  | 3.470090  | -0.160337 |
| H | -2.614447 | 3.116591  | 1.474754  |
| H | -1.065486 | 2.487193  | 0.890028  |
| H | -1.597089 | 4.127906  | 0.411519  |
| H | -4.581403 | 3.355178  | 0.081674  |
| H | -3.651917 | 4.388312  | -1.015707 |
| H | -4.536290 | 3.002334  | -1.678817 |
| H | 1.746454  | -4.039568 | 0.522366  |
| H | 2.976801  | -3.094773 | 1.400552  |
| H | 1.382195  | -2.389143 | 1.127961  |
| H | 3.657388  | -4.284340 | -1.211198 |
| H | 4.417973  | -2.863920 | -1.954399 |
| H | 4.699106  | -3.248666 | -0.222506 |
| H | -2.498351 | -3.765978 | 2.074496  |
| H | -2.012198 | -2.064491 | 2.364499  |
| H | -3.744034 | -2.497025 | 2.184347  |
| H | -3.242293 | -4.463216 | -0.325555 |

|   |           |           |           |
|---|-----------|-----------|-----------|
| H | -4.610262 | -3.385372 | -0.029905 |
| H | -3.627217 | -3.187935 | -1.510782 |
| H | 1.425525  | 3.606790  | 1.905313  |
| H | 0.894756  | 1.910121  | 1.658736  |
| H | 2.368709  | 2.242309  | 2.562596  |
| H | -1.535314 | 3.688129  | -2.082188 |
| H | -0.954777 | 2.002387  | -1.904503 |
| H | -2.463760 | 2.334779  | -2.781144 |
| H | 0.077001  | 1.488019  | -0.237742 |
| H | 0.017519  | 0.063856  | -1.714695 |

-----

Information for structure 4-h2

SCF Convergence : 0.6284D-08  
Maximum Force : 0.000032  
Energy E(RB-P86) -1647.79306126 a.u.  
ZPE-correction : 0.594352 a.u.  
Energy (298K) : -1647.163704 a.u.  
Enthalpy (298K) : -1647.162760 a.u.  
Free Energy (298K): -1647.262146 a.u.

Atom Coordinates (x,y,z) in Angstrom

|    |           |           |           |
|----|-----------|-----------|-----------|
| Ir | 0.000012  | 0.000002  | -0.079259 |
| C  | 2.105006  | -0.069306 | -0.132916 |
| C  | -2.104951 | 0.069307  | -0.132947 |
| Cl | -0.000166 | -0.000100 | 2.402093  |
| N  | 2.913144  | -1.202534 | -0.252645 |
| N  | 3.036511  | 0.974162  | -0.122139 |
| N  | -3.036496 | -0.974125 | -0.122151 |
| N  | -2.913059 | 1.202578  | -0.252594 |
| C  | 4.256132  | -0.857965 | -0.334144 |
| C  | 4.332411  | 0.489552  | -0.248138 |



|   |           |           |           |
|---|-----------|-----------|-----------|
| C | -4.332389 | -0.489453 | -0.248004 |
| C | -4.256061 | 0.858062  | -0.333955 |
| C | 2.491055  | -2.649548 | -0.361510 |
| C | 1.976161  | -2.908104 | -1.789931 |
| C | -2.490916 | 2.649554  | -0.361595 |
| C | 2.787247  | 2.454803  | 0.080513  |
| C | 1.860807  | 2.979928  | -1.025103 |
| C | -2.787365 | -2.454793 | 0.080415  |
| C | -1.860661 | -2.979969 | -1.024959 |
| H | 1.125354  | -2.257382 | -2.026505 |
| H | -0.894963 | -2.464364 | -0.999766 |
| H | 0.895105  | 2.464295  | -1.000054 |
| H | -5.207507 | -1.121547 | -0.260433 |
| H | -5.052276 | 1.581209  | -0.434612 |
| C | -2.220393 | -2.677328 | 1.491482  |
| C | -4.115427 | -3.232591 | -0.027586 |
| C | -1.444698 | 2.969108  | 0.709825  |
| C | -3.704905 | 3.569033  | -0.111447 |
| C | -1.976313 | 2.908010  | -1.790143 |
| H | -2.313619 | -2.822045 | -2.016015 |
| H | -1.695059 | -4.058750 | -0.884077 |
| H | 5.207493  | 1.121690  | -0.260615 |
| H | 5.052359  | -1.581081 | -0.434933 |
| C | 2.219894  | 2.677206  | 1.491453  |
| C | 4.115265  | 3.232715  | -0.027040 |
| C | 1.445098  | -2.969114 | 0.710168  |
| C | 3.705172  | -3.568926 | -0.111631 |
| H | 1.657249  | -3.956727 | -1.890923 |
| H | 2.313998  | 2.821967  | -2.016043 |
| H | 1.695164  | 4.058716  | -0.884336 |
| H | 2.773380  | -2.717298 | -2.525006 |
| H | 3.884179  | 4.298928  | 0.107418  |
| H | 4.831911  | 2.954524  | 0.759742  |
| H | 4.591877  | 3.120367  | -1.012901 |

|   |           |           |           |
|---|-----------|-----------|-----------|
| H | -1.853910 | 2.811971  | 1.717980  |
| H | -0.567776 | 2.314764  | 0.604575  |
| H | -1.126062 | 4.017762  | 0.610509  |
| H | -4.181226 | 3.364129  | 0.858676  |
| H | -3.340952 | 4.606138  | -0.092533 |
| H | -4.460715 | 3.507583  | -0.908540 |
| H | 1.126441  | -4.017771 | 0.610931  |
| H | 1.854592  | -2.812014 | 1.718212  |
| H | 0.568144  | -2.314771 | 0.605155  |
| H | 3.341358  | -4.606081 | -0.093043 |
| H | 4.461000  | -3.507133 | -0.908684 |
| H | 4.181448  | -3.364253 | 0.858566  |
| H | -1.960462 | -3.738925 | 1.623851  |
| H | -1.333623 | -2.060570 | 1.681836  |
| H | -2.973561 | -2.409894 | 2.248559  |
| H | -3.884510 | -4.298812 | 0.107089  |
| H | -4.832368 | -2.954254 | 0.758880  |
| H | -4.591616 | -3.120304 | -1.013657 |
| H | 1.959882  | 3.738784  | 1.623814  |
| H | 1.333062  | 2.060449  | 1.681554  |
| H | 2.972863  | 2.409759  | 2.248723  |
| H | -1.657875 | 3.956742  | -1.891436 |
| H | -1.125223 | 2.257621  | -2.026620 |
| H | -2.773517 | 2.716701  | -2.525101 |
| H | 0.014612  | 0.819433  | -1.411568 |
| H | -0.014449 | -0.819668 | -1.411430 |

---

## References

- <sup>1</sup> Scott, N. M.; Dorta, R.; Stevens, E. D.; Correa, A.; Cavallo, L.; Nolan, S. P. *J. Am. Chem. Soc.* **2005**, *127*, 3516-3526.
